# Supplementary material
Source: PubMed Central journal article supplement (PMC4540677)

# Synthesis and characterization of oligodeoxyribonucleotides modified with 2'-thio-2'-deoxy-2'-S-(pyren-1-yl)methyluridine

Brooke A. Anderson and Patrick J. Hrdlicka

Department of Chemistry, University of Idaho, Moscow, ID 83844

## SUPPORTING INFORMATION

|                                                                                                          |     |
|----------------------------------------------------------------------------------------------------------|-----|
| General experimental section                                                                             | S2  |
| Synthetic protocols                                                                                      | S2  |
| Protocol – pseudorotational analysis of nucleosides                                                      | S5  |
| Protocol – synthesis and purification of ONs                                                             | S6  |
| Protocol – thermal denaturation studies                                                                  | S6  |
| Protocol – determination of thermodynamic parameters                                                     | S7  |
| Protocol – absorption spectra                                                                            | S7  |
| Protocol – steady-state fluorescence emission spectra                                                    | S7  |
| Protocol – electrophoretic mobility shift assay                                                          | S8  |
| Definition zipper nomenclature                                                                           | S9  |
| Pseudorotational analysis data (Table S1)                                                                | S10 |
| MALDI-MS of modified ONs (Table S2)                                                                      | S11 |
| Representative thermal denaturation curves (Fig. S1)                                                     | S11 |
| DNA selectivity of <b>B1-B6</b> (Table S3)                                                               | S12 |
| Additional discussion of DNA/RNA binding specificity                                                     | S13 |
| Discrimination of mismatched RNA targets by <b>S2/O2/N2</b> and reference ONs (Table S4)                 | S14 |
| Discrimination of mismatched DNA targets by <b>S6/O6/N6</b> and reference ONs (Table S5)                 | S14 |
| Absorbance spectra of <b>S</b> -series in absence or presence of cDNA/cRNA (Fig. S2)                     | S15 |
| Fluorescence spectra of <b>S2</b> and <b>S6</b> against central DNA mismatches (Fig. S3)                 | S16 |
| Thermodynamic parameters of <b>S</b> -modified duplexes (enthalpy) (Table S6)                            | S17 |
| Thermodynamic parameters of <b>S</b> -modified duplexes (entropy) (Table S7)                             | S17 |
| Absorption spectra of <b>S</b> -modified zippers, probe duplexes, and single-stranded probes (Fig. S4)   | S18 |
| Invader mediated recognition of DNA hairpin assay (Fig. S5)                                              | S19 |
| References                                                                                               | S20 |
| <sup>1</sup> H, COSY, <sup>13</sup> C, DEPT, HSQC, and <sup>31</sup> P spectra of nucleosides <b>2-4</b> | S21 |

**General experimental section.** Reagents and solvents were commercially available, of analytical grade and used without further purification. Petroleum ether of the distillation range 60-80 °C was used. Solvents were dried over activated molecular sieves: *N,N*-dimethylformamide (3Å); pyridine, CH<sub>2</sub>Cl<sub>2</sub>, 1,2-dichloroethane, triethylamine, and *N,N*-diisopropylethylamine (4Å). Water content of anhydrous solvents was verified on Karl-Fisher apparatus. Reactions were monitored by TLC using silica gel coated plates with a fluorescence indicator (SiO<sub>2</sub>-60, F-254) which were visualized a) under UV light and/or b) by dipping in 5% conc. H<sub>2</sub>SO<sub>4</sub> in absolute ethanol (v/v) followed by heating. Silica gel column chromatography was performed with Silica gel 60 (particle size 0.040–0.063 mm) using moderate pressure (pressure ball). Evaporation of solvents was carried out under reduced pressure at temperatures below 45 °C. After column chromatography, appropriate fractions were pooled, evaporated and dried at high vacuum for at least 12 h to give the obtained products in high purity (>95%) as ascertained by 1D NMR techniques. Exchangeable (ex) protons were detected by disappearance of signals upon D<sub>2</sub>O addition. Assignments of NMR spectra are based on 2D spectra (COSY, HSQC) and DEPT spectra. Quaternary carbons are not assigned in <sup>13</sup>C NMR but verified from HSQC and DEPT spectra (absence of signals). MALDI-HRMS spectra of compounds were recorded on a mass spectrometer using 2,5-dihydroxybenzoic acid as a matrix and polyethylene glycol (PEG 600) as an internal calibration standard.

### **Synthetic protocols.**

**2'-Deoxy-2'-*S*-(pyren-1-yl)methyl-2'-thiouridine (2).** To a flame-dried round-bottomed flask flushed with argon, was added nucleoside **1**<sup>SI</sup> (250 mg, 0.96 mmol), 1-pyrenylmethyl chloride (360 mg, 1.44 mmol), anhydrous DMF (6 mL), and anhydrous Et<sub>3</sub>N (200 μL, 1.44 mmol). The reaction mixture was stirred at room temperature under an argon atmosphere for 17h whereupon it was

diluted with EtOAc (100 mL) and washed with brine (2 x 30 mL), saturated aqueous NaHCO<sub>3</sub> (30 mL) and H<sub>2</sub>O (30 mL). The organic layer was dried (Na<sub>2</sub>SO<sub>4</sub>) and evaporated to dryness. The resulting residue was purified by silica gel column chromatography (0-7 % MeOH in CH<sub>2</sub>Cl<sub>2</sub>, v/v) to afford nucleoside **2** as a pale yellow solid (290 mg, 64%). *R<sub>f</sub>* = 0.3 (10 % MeOH in CH<sub>2</sub>Cl<sub>2</sub>); MALDI-HRMS 497.1148 ([M+Na]<sup>+</sup>, C<sub>26</sub>H<sub>22</sub>N<sub>2</sub>O<sub>5</sub>S·Na<sup>+</sup>, Calcd. 497.1142); <sup>1</sup>H NMR (500 MHz, DMSO-*d*<sub>6</sub>) δ 11.40 (br s, 1H, ex, NH), 8.37-8.40 (d, 1H, *J* = 9.3 Hz, Py), 8.28-8.31 (2d, 2H, *J* = 7.8 Hz, 7.5 Hz, Py), 8.21-8.24 (d, 1H, *J* = 9.3 Hz, Py), 8.18-8.21 (d, 1H, *J* = 7.8 Hz, Py), 8.15-8.18 (d, 1H, *J* = 9.1 Hz, Py), 8.12-8.15 (d, 1H, *J* = 9.1 Hz, Py), 8.06-8.10 (t, 1H, *J* = 7.5 Hz, Py), 7.94-7.97 (d, 1H, *J* = 7.8 Hz, Py), 7.79 (d, 1H, *J* = 8.3 Hz, H<sub>6</sub>), 6.21 (d, 1H, *J* = 8.5 Hz, H<sub>1'</sub>), 5.72 (d, 1H, ex, *J* = 5.5 Hz, 3'-OH), 5.53 (d, 1H, *J* = 8.5 Hz, H<sub>5</sub>), 5.10 (t, 1H, ex, *J* = 5.2 Hz, 5'-OH), 4.52-4.55 (d, 1H, *J* = 12.0 Hz, CH<sub>2</sub>), 4.48-4.51 (d, 1H, *J* = 12.2 Hz, CH<sub>2</sub>), 4.25-4.29 (m, 1H, H<sub>3'</sub>), 3.91-3.94 (m, 1H, H<sub>4'</sub>), 3.56-3.66 (m, 3H, H<sub>2'</sub>, H<sub>5'</sub>); <sup>13</sup>C NMR (75.5 MHz, DMSO-*d*<sub>6</sub>) δ 162.7, 150.8, 140.1 (C<sub>6</sub>), 131.6, 130.7, 130.3, 130.2, 128.4, 127.9 (Py), 127.4 (Py), 127.3 (Py), 127.1 (Py), 126.3 (Py), 125.25 (Py), 125.17 (Py), 124.7 (Py), 124.2, 123.8, 123.5 (Py), 102.3 (C<sub>5</sub>), 87.6 (C<sub>1'</sub>), 86.6 (C<sub>4'</sub>), 71.9 (C<sub>3'</sub>), 61.3 (C<sub>5'</sub>), 52.5 (C<sub>2'</sub>), 32.6 (CH<sub>2</sub>Py).

**2'-Deoxy-5'-O-(4,4'-dimethoxytrityl)-2'-S-(pyren-1-yl)methyl-2'-thiouridine (3).** Nucleoside **2** (200 mg, 0.42 mmol) was coevaporated with anhydrous 1,2-dichloroethane (2 × 5 mL) and re-dissolved in anhydrous pyridine (5 mL). To this was added 4,4'-dimethoxytritylchloride (DMTrCl, 186 mg, 0.55 mmol) and a catalytic amount of 4-dimethylaminopyridine (DMAP, ~5 crystals). The reaction mixture was stirred at room temperature under an argon atmosphere for 19 h, when it was diluted with CH<sub>2</sub>Cl<sub>2</sub> (40 mL) and washed with saturated aqueous NaHCO<sub>3</sub> (30 mL). The aqueous layer was back-extracted with CH<sub>2</sub>Cl<sub>2</sub> (3 × 15 mL) and the combined organic layers were

dried (Na<sub>2</sub>SO<sub>4</sub>), evaporated to dryness and co-evaporated with absolute EtOH and toluene (2:1 v/v, 3 × 20 mL). The resulting residue was purified by silica gel column chromatography (0-6% MeOH in CH<sub>2</sub>Cl<sub>2</sub>, v/v) to yield nucleoside **3** as a tan-colored foam (236 mg, 72%). *R*<sub>f</sub> = 0.7 (10% MeOH in CH<sub>2</sub>Cl<sub>2</sub>, v/v); MALDI-HRMS *m/z* 799.2474 ([M+Na]<sup>+</sup>, C<sub>47</sub>H<sub>40</sub>N<sub>2</sub>O<sub>7</sub>S·Na<sup>+</sup>, Calcd. 799.2448); <sup>1</sup>H NMR (500 MHz, DMSO-*d*<sub>6</sub>) δ 11.48 (d, 1H, ex, *J* = 2.0 Hz, NH), 8.38-8.41 (d, 1H, *J* = 9.0 Hz, Py), 8.28-8.31 (d, 2H, *J* = 7.5 Hz, Py), 8.21-8.24 (d, 1H, *J* = 9.0 Hz, Py), 8.11-8.18 (m, 3H, Py), 8.06-8.10 (t, 1H, *J* = 7.5 Hz, Py), 7.95-7.98 (d, 1H, *J* = 8.0 Hz, Py), 7.64 (d, 1H, *J* = 8.0 Hz, H6), 7.35-7.38 (m, 2H, DMTr), 7.29-7.33 (m, 2H, DMTr), 7.21-7.26 (m, 5H, DMTr), 6.85-6.88 (m, 4H, DMTr), 6.21 (d, 1H, *J* = 7.5 Hz, H1'), 5.77 (d, 1H, ex, *J* = 5.5 Hz, 3'-OH), 5.42 (dd, 1H, *J* = 8.0 Hz, 2.0 Hz, H5), 4.57-4.60 (d, 1H, *J* = 12.0 Hz, CH<sub>2</sub>), 4.50-4.54 (d, 1H, *J* = 12.0 Hz, CH<sub>2</sub>), 4.21-4.25 (m, 1H, H3'), 3.98-4.02 (m, 1H, H4'), 3.66-3.75 (m, 7H, H2', CH<sub>3</sub>O), 3.26-3.31 (m, 1H, H5'), 3.20-3.24 (m, 1H, H5'); <sup>13</sup>C NMR (125 MHz, DMSO-*d*<sub>6</sub>) δ 162.7, 158.1, 150.6, 144.6, 140.1 (C6), 135.3, 135.2, 131.5, 130.7, 130.3, 130.2, 129.70 (DMTr), 129.68 (DMTr), 128.4, 127.84 (DMTr), 127.76 (Py), 127.6 (DMTr), 127.4 (Py), 127.3 (Py), 127.2 (Py), 126.7 (DMTr), 126.3 (Py), 125.3 (Py), 125.2 (Py), 124.7 (Py), 124.2, 123.8, 123.5 (Py), 113.20 (DMTr), 113.19 (DMTr), 102.2 (C5), 88.1 (C1'), 85.9, 84.5 (C4'), 71.2 (C3'), 63.5 (C5'), 55.0 (CH<sub>3</sub>O), 52.3 (C2'), 32.6 (CH<sub>2</sub>Py).

**2'-Deoxy-3'-O-(*N,N*-diisopropylamino-2-cyanoethoxyphosphinyl)-5'-O-(4,4'-**

**dimethoxytrityl)-2'-S-(pyren-1-yl)methyl-2'-thiouridine (4).** Nucleoside **3** (160 mg, 0.21 mmol) was coevaporated with anhydrous 1,2-dichloroethane (2 × 3 mL) and re-dissolved in anhydrous CH<sub>2</sub>Cl<sub>2</sub> (3 mL). To this was added anhydrous *N,N*-diisopropylethylamine (DIPEA, 145 μL, 0.82 mmol) followed by dropwise addition of 2-cyanoethyl-*N,N*-

diisopropylchlorophosphoramidite (CEP-Cl, 92  $\mu$ L, 0.41 mmol). The reaction mixture was stirred under an argon atmosphere at room temperature for 2 h when absolute EtOH (0.5 mL) was added. Solvents were evaporated off and the resulting residue was purified by silica gel column chromatography (0-60% EtOAc in petroleum ether, v/v) followed by precipitation from CH<sub>2</sub>Cl<sub>2</sub> and petroleum ether to afford nucleoside **4** as a tan-colored foam (146 mg, 73%).  $R_f$  = 0.6 (3% MeOH in CH<sub>2</sub>Cl<sub>2</sub>, v/v); MALDI-HRMS  $m/z$  999.3487 ([M+Na]<sup>+</sup>, C<sub>56</sub>H<sub>57</sub>N<sub>3</sub>O<sub>8</sub>S·Na<sup>+</sup>, Calcd. 999.3527); <sup>31</sup>P NMR (121 MHz, CDCl<sub>3</sub>)  $\delta$  150.9, 149.9.

**Protocol – pseudorotational analysis of nucleosides.** A Matlab-based pseudorotational analysis program<sup>S2</sup> was used to determine  $P$  and  $\phi_m$  for the furanose ring of nucleoside **3** from <sup>3</sup> $J_{HH}$  scalar coupling constants of the endocyclic sugar protons. Appropriate electronegativity ( $\epsilon_{en}$ ) values for the  $\beta$ -D-ribose ring and the C<sub>2'</sub>-substituents were selected from the electronegativity editor interface using DMSO solvent values: OR ( $\epsilon_{en}$  = 1.400), NR<sub>2</sub> ( $\epsilon_{en}$  = 1.200) and SR ( $\epsilon_{en}$  = 0.785). Coupling constants for <sup>3</sup> $J_{H1'H2'}$ , <sup>3</sup> $J_{H2'H3'}$ , and <sup>3</sup> $J_{H3'H4'}$  were obtained from <sup>1</sup>H NMR (500 MHz, DMSO-*d*<sub>6</sub>, 25 °C) data analysis. Two prototypical North and South conformations ( $P_A$  = 18°,  $P_B$  = 153.6°,  $\phi_m$  = 38°, proportion of conformer A = 30-50 %) were chosen as starting structures for fitting of the modified Karplus-Diez-Donders equations to the experimental <sup>3</sup> $J_{HH}$  coupling constants.<sup>S2-S4</sup> The process was repeated in an iterative manner using the main *North* and *South* type conformations from the previous run as seed structures, until no further significant conformational changes were observed (typically 3 runs). The key features of the optimized conformers and their relative proportions are reported in Table S1.

**Protocol - synthesis and purification of ONs.** Modified ONs were synthesized on a 0.2  $\mu\text{mol}$  scale using a DNA synthesizer and succinyl linked LCAA-CPG (long chain alkyl amine controlled pore glass) columns with a pore size of 500Å. Standard protocols for incorporation of DNA monomers were used. Extended hand-coupling conditions (15 min) were used for incorporation of monomer **S** using 4,5-dicyanoimidazole as an activator with >95% coupling yield. Extended oxidation (45s) was used. Cleavage from solid support and removal of protecting groups was accomplished using 32% aqueous ammonia (55 °C, 12 h). ONs were purified in the DMTr-on mode via ion-pair reverse phase HPLC (C18 column) using a 0.05 M triethylammonium acetate - water/acetonitrile gradient. This was followed by detritylation (80% aqueous AcOH) and precipitation (NaOAc/NaClO<sub>4</sub>/acetone, -18 °C for 12-16 h). The identity of synthesized ONs was established through MALDI-MS analysis recorded in positive ion mode on a quadrupole time-of-flight tandem mass spectrometer equipped with a MALDI source using anthranilic acid, 3-hydroxypicolinic acid (3-HPA) as a matrix (Table S2). Purity was verified by ion-pair reverse phase HPLC running in analytical mode (>90%).

**Protocol - thermal denaturation studies.** ON concentrations were estimated using the following extinction coefficients for DNA (OD/ $\mu\text{mol}$ ): G (12.01), A (15.20), T (8.40), C (7.05); RNA (OD/ $\mu\text{mol}$ ): G (13.70), A (15.40), U (10.00), C (9.00); and pyrene (22.4)<sup>S5</sup>. Strands were thoroughly mixed and denatured by heating to 70 °C, followed by cooling to the starting temperature of the experiment. Quartz optical cells with a path length of 1.0 cm were used. Thermal denaturation temperatures of duplexes (1.0  $\mu\text{M}$  final concentration of each strand) were measured using a UV/vis spectrophotometer equipped with a 12-cell Peltier temperature controller and determined as the maximum of the first derivative of the thermal denaturation curve ( $A_{260}$  vs.

$T$ ) recorded in medium salt phosphate buffer ( $T_m$  buffer: 100 mM NaCl, 0.1 mM EDTA; pH 7.0 adjusted with 10 mM  $\text{Na}_2\text{HPO}_4$  and 5 mM  $\text{Na}_2\text{HPO}_4$ ). The temperature of the denaturation experiments ranged from at least 15 °C below  $T_m$  (although not below 3 °C) to 20 °C above  $T_m$ . A temperature ramp of 0.5 °C/min was used in all experiments. Reported  $T_m$ 's are averages of two experiments within  $\pm 1.0$  °C.

**Protocol - determination of thermodynamic parameters.** Thermodynamic parameters for duplex formation were determined through baseline fitting of denaturation curves using software provided with the UV/Vis spectrometer. Bimolecular reactions, two-state melting behavior, and a heat capacity change of  $\Delta C_p = 0$  upon hybridization were assumed.<sup>S6</sup> A minimum of two experimental denaturation curves were each analyzed at least three times to minimize errors arising from baseline choice. Averages and standard deviations are listed.

**Protocol - absorption spectra.** UV-Vis absorption spectra (range 200-600 nm) were recorded at 10 °C using the same samples and instrumentation as used in the thermal denaturation experiments.

**Protocol - steady-state fluorescence emission spectra.** Steady-state fluorescence emission spectra of S-modified ONs modified and the corresponding duplexes with cDNA/cRNA, were recorded in non-deoxygenated thermal denaturation buffer (each strand at 1.0  $\mu\text{M}$  concentration) and obtained as an average of five scans using an excitation wavelength of  $\lambda_{\text{ex}} = 350$  nm. Excitation and emission slits of 5.0 nm and 2.5 nm, respectively were used along with a scan speed of 600 nm/min. Experiments were determined at 10 °C with  $\text{N}_2$  flow to ascertain maximal hybridization of probes to DNA/RNA targets and minimize condensation, respectively.

**Protocol - electrophoretic mobility shift assay.** This assay was performed essentially as previously described.<sup>S7</sup> Unmodified DNA hairpin **DH1** was obtained from commercial sources and used without further purification. The DNA hairpin was 3'-DIG-labeled using the 2<sup>nd</sup> generation DIG Gel Shift Kit (Roche Applied Bioscience) as recommended by the manufacturer. The DIG-labeled ON obtained in this manner was diluted and used without further purification in the recognition experiments. Pre-annealed probe (85 °C for 10 min, cooled to room temperature over 15 min) and DIG-labeled DNA hairpins (34.4 nM) were mixed and incubated in HEPES buffer (50 mM HEPES, 100 mM NaCl, 5 mM MgCl<sub>2</sub>, 10% sucrose, 1.44 mM spermine tetrahydrochloride, pH 7.2) for the specified time at ambient temperature (~21±3 °C). The reaction mixtures were then diluted with 6x DNA loading dye (Fermentas) and loaded onto a 16% non-denaturing polyacrylamide gel. Electrophoresis was performed using a constant voltage of 70 V for 2.5 h at ~4 °C using 0.5x TBE as a running buffer (45 mM Tris, 45 mM boric acid, 1 mM EDTA). Gels were blotted onto positively charged nylon membranes (Roche Applied Bioscience) using constant voltage with external cooling (100V, ~4 °C). The membranes were exposed to anti-digoxigenin-AP F<sub>ab</sub> fragments as recommended by the manufacturer of the DIG Gel Shift Kit, transferred to a hybridization jacket, and incubated with the substrate (CSPD) in detection buffer for 10 min at 37 °C. The chemiluminescence of the formed product was captured on X-ray film, which was developed using an X-Omatic 1000A X-ray film developer (Kodak). The resulting bands were quantified using Image J software. Invasion efficiency was determined as the intensity ratio between the recognition complex band and the total lane. An average of three independent experiments is reported.



**Definition of zipper nomenclature.** The following nomenclature describes the relative arrangement between two monomers positioned on opposing strands in a duplex. The number  $n$  describes the distance measured in number of base pairs and has a positive value if a monomer is shifted toward the 5'-side of its own strand relative to a second reference monomer on the other strand. Conversely,  $n$  has a negative value if a monomer is shifted toward the 3'-side of its own strand relative to a second reference monomer on the other strand.

**Table S1.**  $^3J_{\text{HH}}$  scalar coupling constants, pseudorotation phase angles ( $P$ ) and puckering amplitudes ( $\phi_m$ ) for nucleoside **3** (monomer **S**) and the corresponding nucleosides for monomer **O** and **N**.

| Monomer                | <b>S</b> | <b>O</b>         | <b>N</b>           |
|------------------------|----------|------------------|--------------------|
| $J_{1'-2'}$            | 7.5      | 4.1 <sup>a</sup> | 8.3 <sup>a</sup>   |
| $J_{2'-3'}$            | 6.0      | 4.9 <sup>a</sup> | 5.7 <sup>a</sup>   |
| $J_{3'-4'}$            | 3.9      | 5.8 <sup>a</sup> | 2.3 <sup>a</sup>   |
| <b>Conformation I</b>  |          |                  |                    |
| $P$                    | 56.5     | 11.0             | 121.6 <sup>‡</sup> |
| $\phi_m$               | 26.9     | 38.4             | 27.4               |
| <b>Conformation II</b> |          |                  |                    |
| $P$                    | 143.0    | 130.3            | 145.1 <sup>‡</sup> |
| $\phi_m$               | 37.5     | 33.4             | 37.8               |
| % Conformation II      | 61       | 49               | 61                 |

<sup>‡</sup>The Matlab script was unable to fit the data for this nucleoside to a *North* type conformations, despite different input conditions. Invariably, two *South* type conformations were predicted.

<sup>a</sup>Data from reference S8.

**Table S2.** MALDI-MS of ONs modified with monomer **S**.<sup>a</sup>

| ONs       | Sequence                       | Calc. $m/z$ [M+H] <sup>+</sup> | Found $m/z$ [M+H] <sup>+</sup> |
|-----------|--------------------------------|--------------------------------|--------------------------------|
| <b>S1</b> | 5'-G <u>S</u> G ATA TGC        | 2985.5                         | 2985.8                         |
| <b>S2</b> | 5'-GTG A <u>S</u> A TGC        | 2985.5                         | 2985.8                         |
| <b>S3</b> | 5'-GTG ATA <u>S</u> GC         | 2985.5                         | 2984.7                         |
| <b>S4</b> | 3'-CAC <u>S</u> AT ACG         | 2914.5                         | 2914.8                         |
| <b>S5</b> | 3'-CAC TA <u>S</u> ACG         | 2914.5                         | 2914.8                         |
| <b>S6</b> | 3'-CAC <u>S</u> A <u>S</u> ACG | 3146.6                         | 3146.9                         |

<sup>a</sup> For structure of monomer **S**, see Figure 1 in the main manuscript.

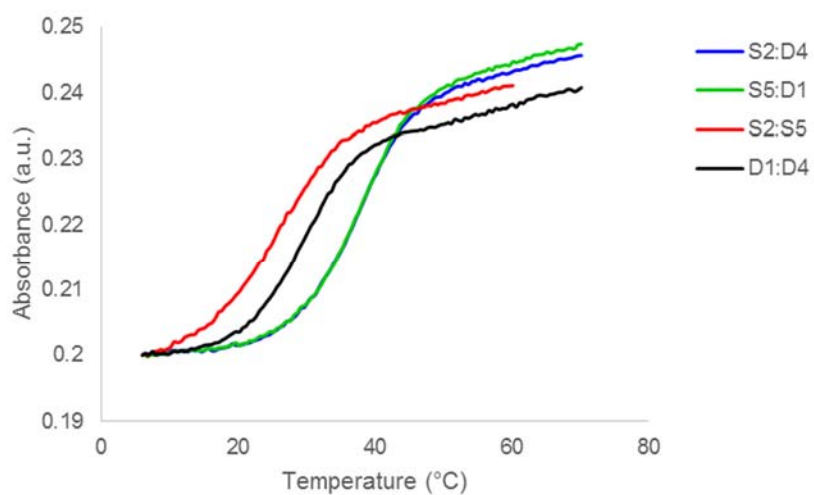

**Figure S1.** Representative thermal denaturation curves of **S**-modified duplexes and reference duplex **D1:D4**. For experimental conditions, see Table 1.

**Additional discussion regarding DNA-selectivity.** The DNA selectivity, defined as  $\Delta\Delta T_m$  (DNA-RNA) =  $\Delta T_m$  (vs cDNA) -  $\Delta T_m$  (vs cRNA) > 0 °C, of **S**-modified ONs is very similar to the DNA selectivity observed for **O**- and **N**-modified ONs ( $\Delta\Delta T_m$  from +9.0 to +16.5 °C, Table S3), indicating that the pyrene moiety of **S**-modified ONs likely has a similar binding mode as in **O**- and **N**-modified ONs.

**Table S3.** DNA selectivity of **B1-B6**.<sup>a</sup>

| ON        | Duplex                         | <b>B</b> = | $\Delta\Delta T_m/\text{mod (DNA-RNA)}$ [°C] |                       |                       |
|-----------|--------------------------------|------------|----------------------------------------------|-----------------------|-----------------------|
|           |                                |            | <b>S</b>                                     | <b>O</b> <sup>b</sup> | <b>N</b> <sup>b</sup> |
| <b>B1</b> | 5'-G <b>B</b> G ATA TGC        |            | +9.0                                         | +7.0                  | +9.5                  |
| <b>B2</b> | 5'-GTG A <b>B</b> A TGC        |            | +10.0                                        | +8.5                  | +12.5                 |
| <b>B3</b> | 5'-GTG ATA <b>B</b> GC         |            | +9.5                                         | +8.0                  | +8.5                  |
| <b>B4</b> | 3'-CAC <b>B</b> AT ACG         |            | +10.0                                        | +8.0                  | +8.5                  |
| <b>B5</b> | 3'-CAC TA <b>B</b> ACG         |            | +10.0                                        | +9.0                  | +12.5                 |
| <b>B6</b> | 3'-CAC <b>B</b> A <b>B</b> ACG |            | +16.5                                        | +15.0                 | +18.5                 |

<sup>a</sup> DNA selectivity defined as  $\Delta\Delta T_m$  (DNA-RNA) =  $\Delta T_m$  (vs cDNA) -  $\Delta T_m$  (vs cRNA).

<sup>b</sup> From reference S8.

**Additional discussion of DNA/RNA binding specificity.** Reference strand **D1** displays the expected specificity profile against mismatched RNA targets, i.e., mismatched duplexes have lower  $T_m$ 's than matched duplexes, with T:rG being the least efficiently discriminated mismatched base pair (Table S4). Singly modified **S2** and benchmark ONs **O2** and **N2** have comparable binding specificity profiles except for significantly decreased discrimination of T:U pairs.

The binding specificities of ONs with two next-nearest neighbor modifications (**B6-series**) were determined using DNA targets with a mismatched nucleotide opposite of the central 2'-deoxyriboadenosine (Table S5). We have previously shown that **O6** and **N6** display unexpectedly good binding specificity compared to the poor binding specificities of **O2** and **N2** (Table 2). Interestingly, **S6** discriminates the mismatched DNA targets less efficiently than **O6** and **N6**, which suggests that the sulfur of monomer **S** interferes with the binding mode leading to improved binding specificity.

**Table S4.** Discrimination of mismatched RNA targets by **B2**-series and reference strands.<sup>a</sup>

| ON                    | Sequence               | <u>B</u> = | RNA: 3'-CAC <u>BU</u> ACG |        |                   |        |
|-----------------------|------------------------|------------|---------------------------|--------|-------------------|--------|
|                       |                        |            | $T_m$ [°C]                |        | $\Delta T_m$ [°C] |        |
|                       |                        |            | A                         | C      | G                 | U      |
| <b>D1</b>             | 5' – GTG ATA TGC       |            | <b>27.5</b>               | <-17.5 | -4.5              | <-17.5 |
| <b>S2</b>             | 5' – GTG <u>SA</u> TGC |            | <b>25.5</b>               | <-15.5 | -5.5              | -8.5   |
| <b>O2<sup>b</sup></b> | 5' – GTG <u>QA</u> TGC |            | <b>31.5</b>               | -17.5  | -3.5              | -9.5   |
| <b>N2<sup>b</sup></b> | 5' – GTG <u>NA</u> TGC |            | <b>30.5</b>               | -16.5  | -0.5              | -13.0  |

<sup>a</sup> For conditions of thermal denaturation experiments, see Table 1.  $T_m$ 's of fully matched duplexes are shown in bold.  $\Delta T_m$  = change in  $T_m$  relative to fully matched DNA:RNA duplex.

<sup>b</sup> From reference S8.

**Table S5.** Discrimination of mismatched DNA targets by **S6/O6/N6** and reference strands.<sup>a</sup>

| ON                    | Sequence             | <u>B</u> = | DNA: 5'-GTG <u>BA</u> TGC |       |                   |       |
|-----------------------|----------------------|------------|---------------------------|-------|-------------------|-------|
|                       |                      |            | $T_m$ [°C]                |       | $\Delta T_m$ [°C] |       |
|                       |                      |            | T                         | A     | C                 | G     |
| <b>D4</b>             | 3'-CAC TAT ACG       |            | <b>29.5</b>               | -17.0 | -15.5             | -9.0  |
| <b>S6</b>             | 3'-CAC <u>SA</u> ACG |            | <b>37.5</b>               | -12.5 | -12.0             | -12.0 |
| <b>O2<sup>b</sup></b> | 3'-CAC <u>QA</u> ACG |            | <b>43.5</b>               | -24.0 | -17.0             | -14.0 |
| <b>N2<sup>b</sup></b> | 3'-CAC <u>NA</u> ACG |            | <b>43.5</b>               | -21.5 | -10.5             | -13.5 |

<sup>a</sup> For conditions of thermal denaturation experiments, see Table 1.  $T_m$ 's of fully matched duplexes are shown in bold.  $\Delta T_m$  = change in  $T_m$  relative to fully matched duplex

<sup>b</sup> From reference S8.

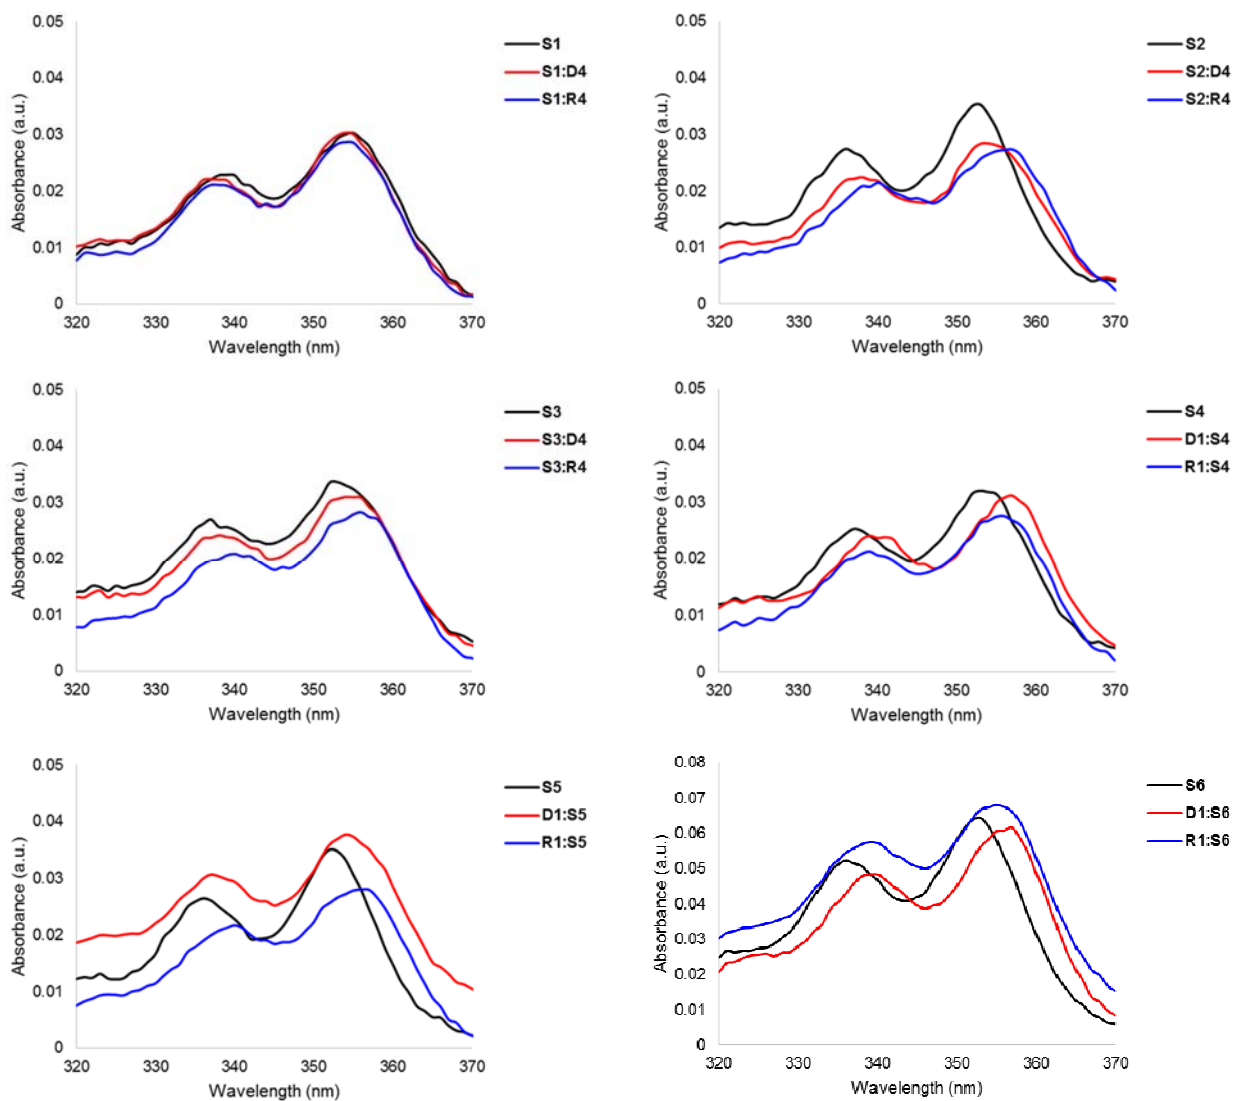

**Figure S2.** Absorption spectra of single-stranded **S1-S6** and the corresponding duplexes with cDNA/cRNA targets. Spectra were recorded at  $T = 10\text{ }^{\circ}\text{C}$  using each strand at  $1.0\text{ }\mu\text{M}$  concentration in  $T_m$  buffer. Note that a different Y-axis scale is used for **S6**.

**Discrimination of mismatched DNA targets via fluorescence.** Neither singly or doubly S-modified ONs allow for discrimination of DNA targets with centrally mismatched nucleotides via fluorescence (Figure S3). Thus, S-modified ONs have limited potential as probes for fluorescent discrimination of single nucleotide polymorphisms (SNPs).

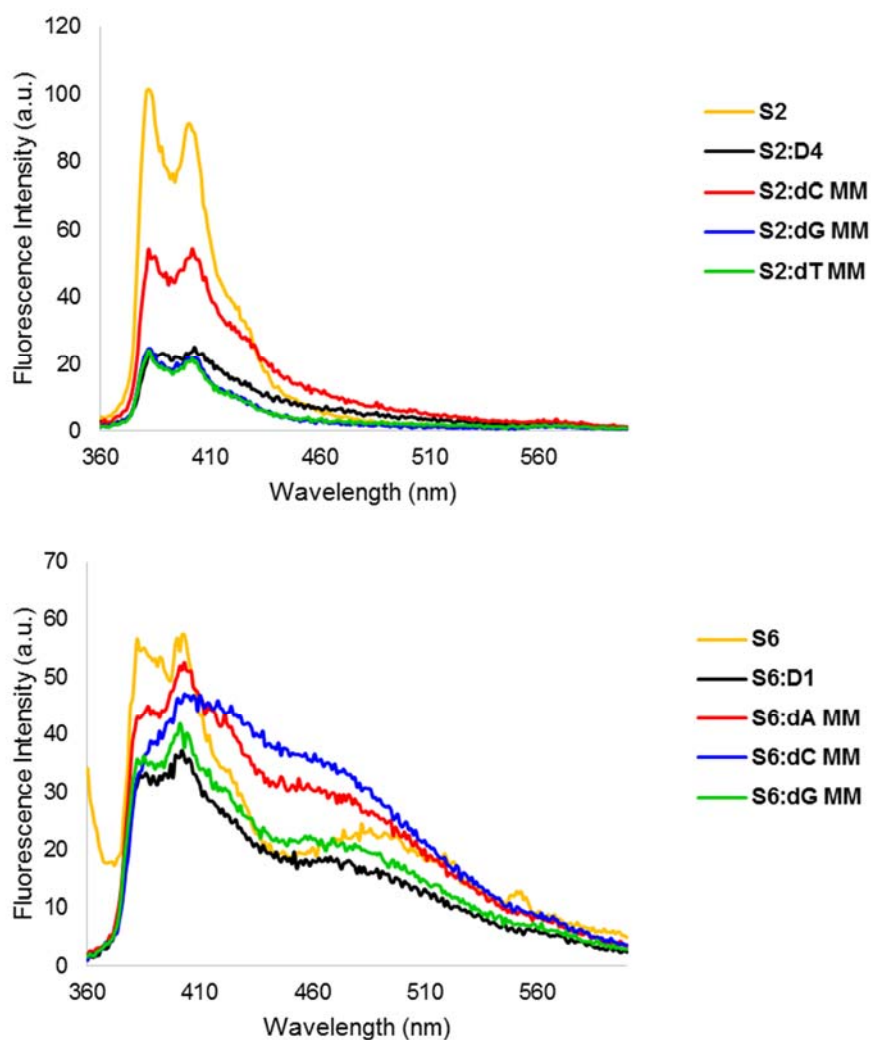

**Figure S3.** Steady-state fluorescence emission spectra of **S2** and **S6** against matched and centrally mismatched DNA targets (mismatched nucleotide specified). Spectra were recorded at  $T = 10\text{ }^{\circ}\text{C}$  using  $\lambda_{\text{ex}} = 350\text{ nm}$  and each strand at  $1.0\text{ }\mu\text{M}$  concentration in  $T_m$  buffer.



**Table S6.** Change in enthalpy upon duplex formation ( $\Delta H$ ) and reaction enthalpy for recognition of isosequential dsDNA target **D1:D4** ( $\Delta H_{\text{rec}}$ ).<sup>a</sup>

| ON                     | ZP | Sequence                                           | $\Delta H$ [ $\Delta\Delta H$ ] (kJ/mol) |                     |                      | $\Delta H_{\text{rec}}$<br>(kJ/mol) |
|------------------------|----|----------------------------------------------------|------------------------------------------|---------------------|----------------------|-------------------------------------|
|                        |    |                                                    | upper ON<br>vs cDNA                      | lower ON<br>vs cDNA | probe<br>duplex      |                                     |
| <b>S1</b><br><b>S5</b> | +4 | 5'-G <u>S</u> G ATA TGC<br>3'-CAC T <u>A</u> S ACG | -308±3 [-22]                             | -331±9 [-45]        | -356±8 [-70]         | +3                                  |
| <b>S1</b><br><b>S4</b> | +2 | 5'-G <u>S</u> G ATA TGC<br>3'-CAC <u>S</u> AT ACG  | -308±3 [-22]                             | -314±4 [-28]        | -260±6 [+26]         | -76                                 |
| <b>S2</b><br><b>S5</b> | +1 | 5'-GTG <u>A</u> SA TGC<br>3'-CAC T <u>A</u> S ACG  | <b>-320±6 [-34]</b>                      | <b>-331±9 [-45]</b> | <b>-275±10 [+11]</b> | <b>-90</b>                          |
| <b>S2</b><br><b>S4</b> | -1 | 5'-GTG <u>A</u> SA TGC<br>3'-CAC <u>S</u> AT ACG   | -320±6 [-34]                             | -314±4 [-28]        | -316±4 [-30]         | -32                                 |

<sup>a</sup>  $\Delta\Delta H$  is measured relative to  $\Delta H$  for **D1:D4** = -286 kJ/mol.  $\Delta H_{\text{rec}} = \Delta H$  (upper ON vs cDNA) +  $\Delta H$  (lower ON vs cDNA) -  $\Delta H$  (probe duplex) -  $\Delta H$  (**D1:D4**). "ZP" and "±" denotes zipper and standard deviation, respectively.

**Table S7.** Change in entropy at 293K upon duplex formation ( $-T^{293}\Delta S$ ) and reaction entropy for recognition of isosequential dsDNA target **D1:D4** ( $-T^{293}\Delta S_{\text{rec}}$ ).<sup>a</sup>

| Duplex                 | ZP | Sequence                                           | $-T^{293}\Delta S$ [ $\Delta(T^{293}\Delta S)$ ] (kJ/mol) |                     |                   | $-T^{293}\Delta S_{\text{rec}}$<br>(kJ/mol) |
|------------------------|----|----------------------------------------------------|-----------------------------------------------------------|---------------------|-------------------|---------------------------------------------|
|                        |    |                                                    | upper ON<br>vs cDNA                                       | lower ON<br>vs cDNA | probe<br>duplex   |                                             |
| <b>S1</b><br><b>S5</b> | +4 | 5'-G <u>S</u> G ATA TGC<br>3'-CAC T <u>A</u> S ACG | 259±3 [+19]                                               | 275±9 [+35]         | 297±8 [+57]       | -3                                          |
| <b>S1</b><br><b>S4</b> | +2 | 5'-G <u>S</u> G ATA TGC<br>3'-CAC <u>S</u> AT ACG  | 259±3 [+19]                                               | 266±4 [+26]         | 214±5 [-26]       | +71                                         |
| <b>S2</b><br><b>S5</b> | +1 | 5'-GTG <u>A</u> SA TGC<br>3'-CAC T <u>A</u> S ACG  | <b>265±6 [+25]</b>                                        | <b>275±9 [+35]</b>  | <b>231±9 [-9]</b> | <b>+69</b>                                  |
| <b>S2</b><br><b>S4</b> | -1 | 5'-GTG <u>A</u> SA TGC<br>3'-CAC <u>S</u> AT ACG   | 265±6 [+25]                                               | 266±4 [+26]         | 265±4 [+25]       | +26                                         |

<sup>a</sup>  $\Delta(T^{293}\Delta S)$  is measured relative to  $-T^{293}\Delta S$  for **D1:D4** = 240 kJ/mol.  $-T^{293}\Delta S_{\text{rec}} = \Delta(T^{293}\Delta S)$  (upper ON vs cDNA) +  $\Delta(T^{293}\Delta S)$  (lower ON vs cDNA) -  $\Delta(T^{293}\Delta S)$  (probe duplex).

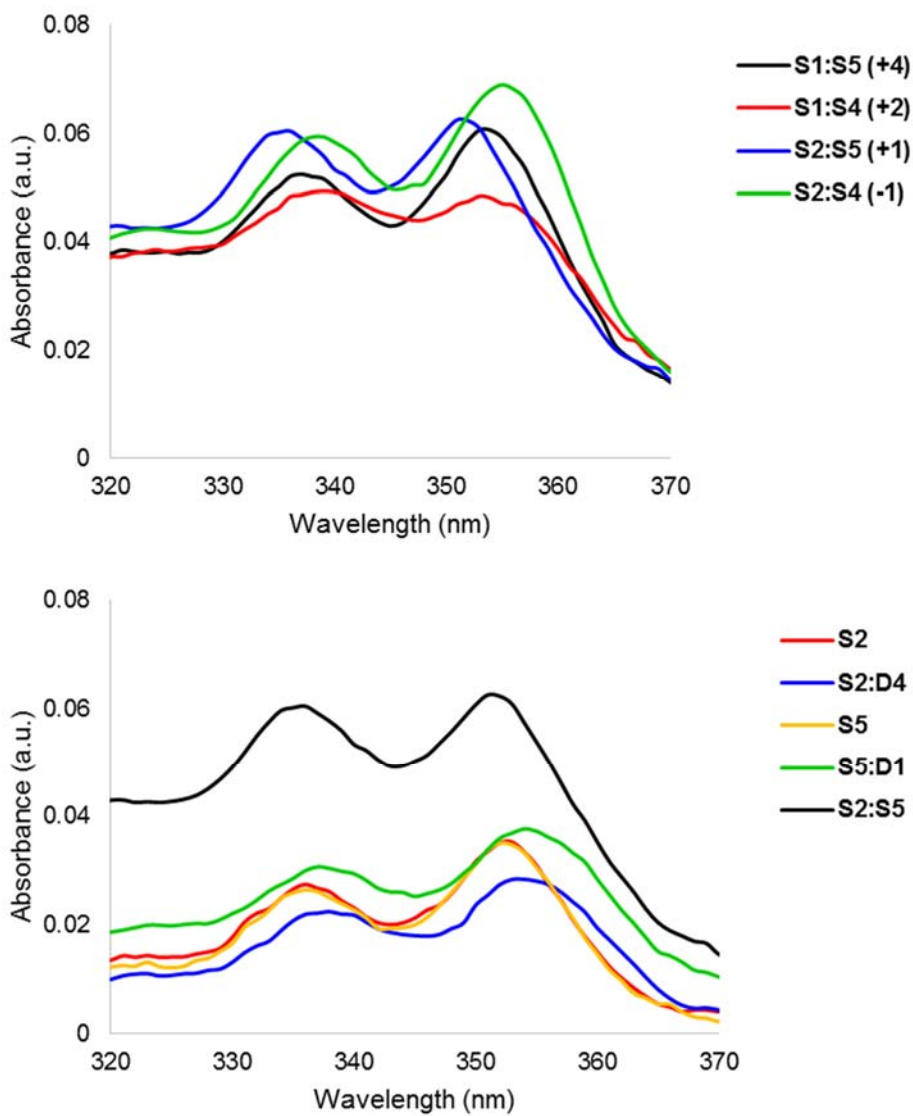

**Figure S4.** Absorption spectra of representative Invaders, duplexes between probe strands and cDNA, and single-stranded probes. Recorded at  $T = 10\text{ }^{\circ}\text{C}$  using each strand at  $1.0\text{ }\mu\text{M}$  concentration in  $T_m$  buffer.

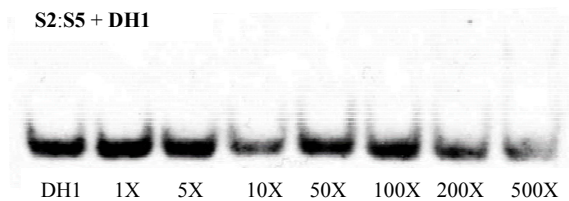

**Figure S5.** Representative gel electrophoretogram from experiments in which target **DH1** (34.4 nM) was annealed together with **S2:S5** (variable fold molar excess) at 85 °C for 15 min followed by slow cooling to room temperature over ~30 min and incubation at ambient temperature for 12-16 h. Experimental conditions otherwise as specified in Figure 4.

## References

- (S1) Divakar, K. J.; Mottah, A.; Reese, C. B.; Sanghvi, Y. S. *J. Chem. Soc. Perkin Trans. 1* **1990**, 969.
- (S2) Hendrickx, P. M. S.; Martins, J. C. *Chem. Cent. J.* **2008**, 2:20.
- (S3) Donders, L. A.; Deleeuw, F. A. A. M.; Altona, C. *Magn. Res. Chem.* **1989**, 27, 556.
- (S4) (a) Diez, E.; Esteban, A.; Guilleme, J.; Bermejo, F. *J. Mol. Struct.* **1981**, 70, 61; (b) Diez, E.; Esteban, A.; Bermejo, F.; Altona, C.; de Leeuw, F. A. A. M. *J. Mol. Struct.* **1984**, 125, 49; (c) de Leeuw, F. A. A. M.; van Kampen, P.; Altona, C.; Diez, E.; Esteban, A. *J. Mol. Struct.* **1984**, 125, 67.
- (S5) Dioubankova, N. N.; Malakhov, A. D.; Stetsenko, D. A.; Gait, M. J.; Volynsky, P. E.; Efremov, R. G.; Korshun, V. A. *ChemBioChem* **2003**, 4, 841.
- (S6) Mergny, J. L.; Lacroix, L. *Oligonucleotides* **2003**, 13, 515.
- (S7) Didion, B. A.; Karmakar, S.; Guenther, D. C.; Sau, S.; Verstegen, J. P.; Hrdlicka, P. J. *ChemBioChem* **2013**, 14, 1534.
- (S8) Karmakar, S.; Anderson, B. A.; Rathje, R. L.; Andersen, S.; Jensen, T.; Nielsen, P.; Hrdlicka, P. J. *J. Org. Chem.* **2011**, 76, 7119.

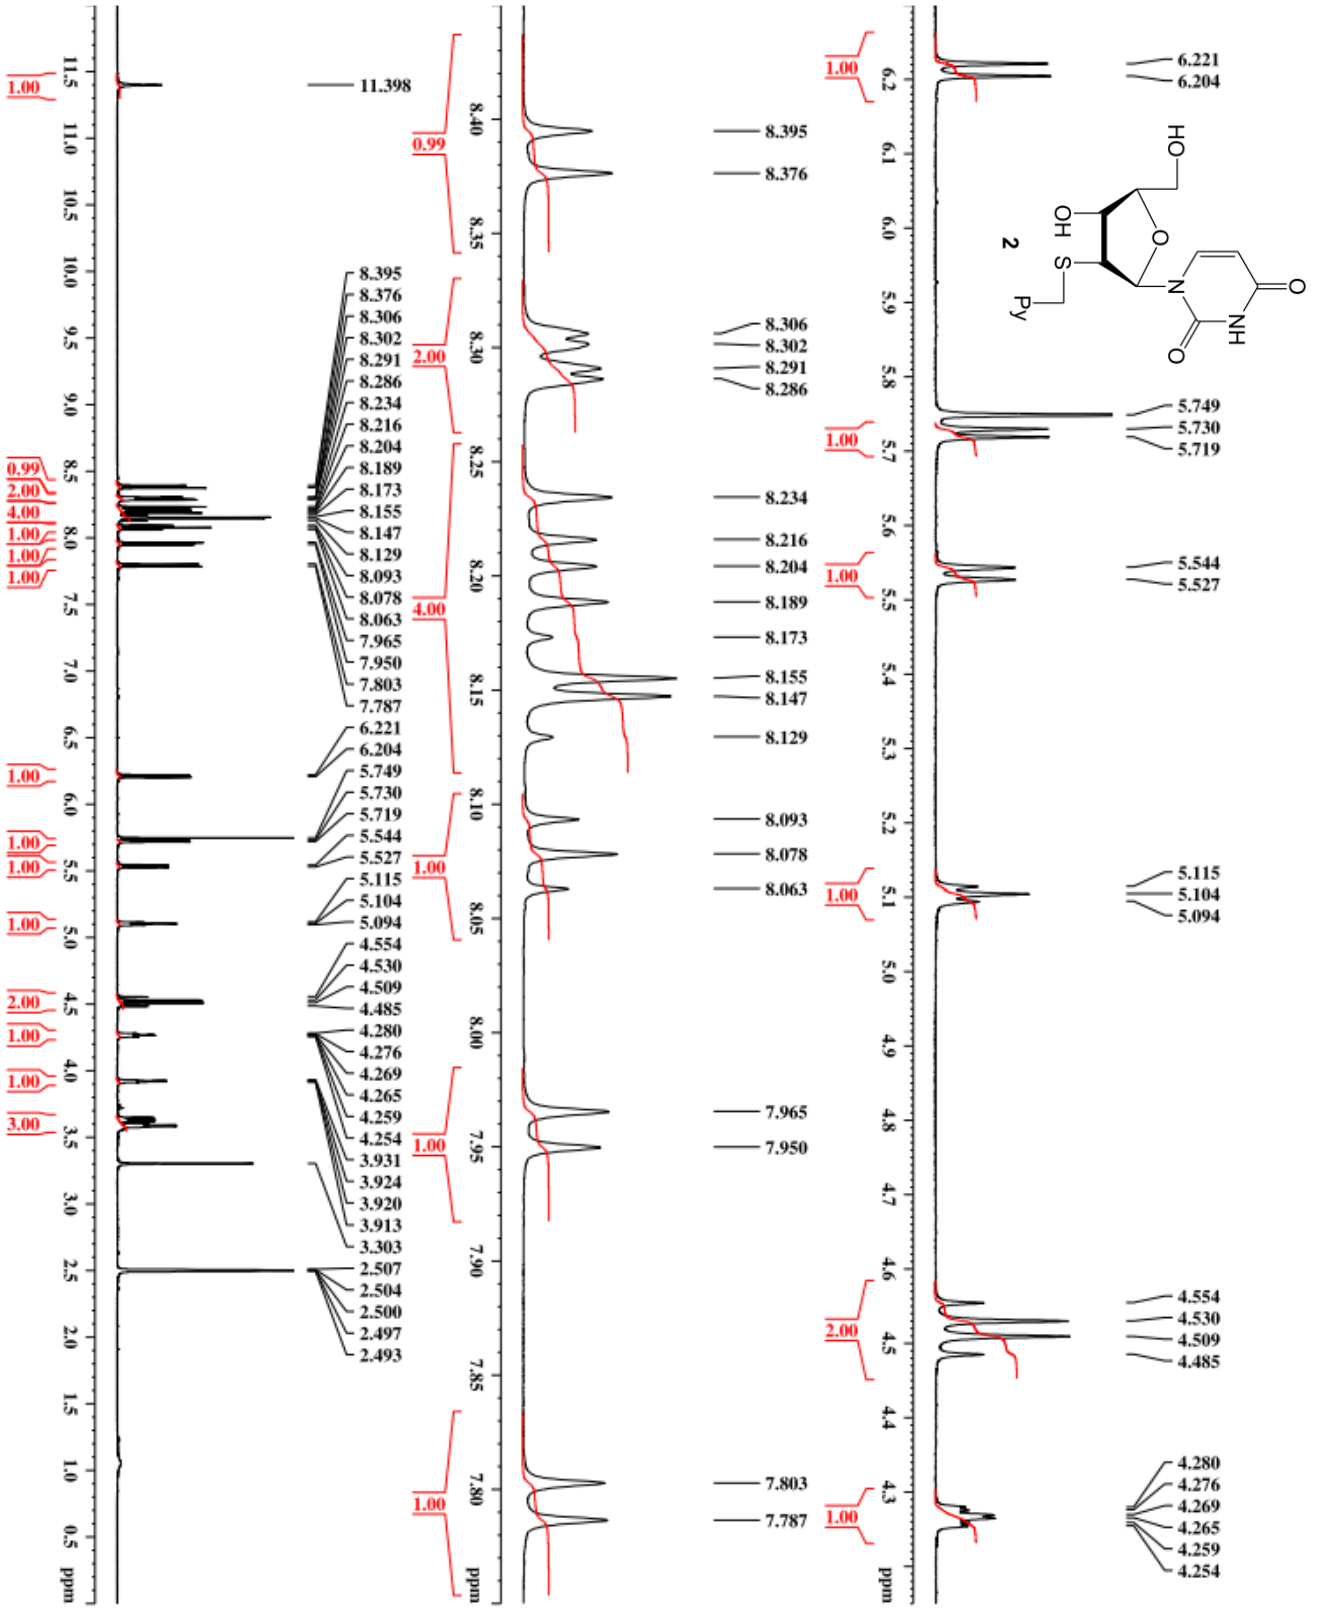

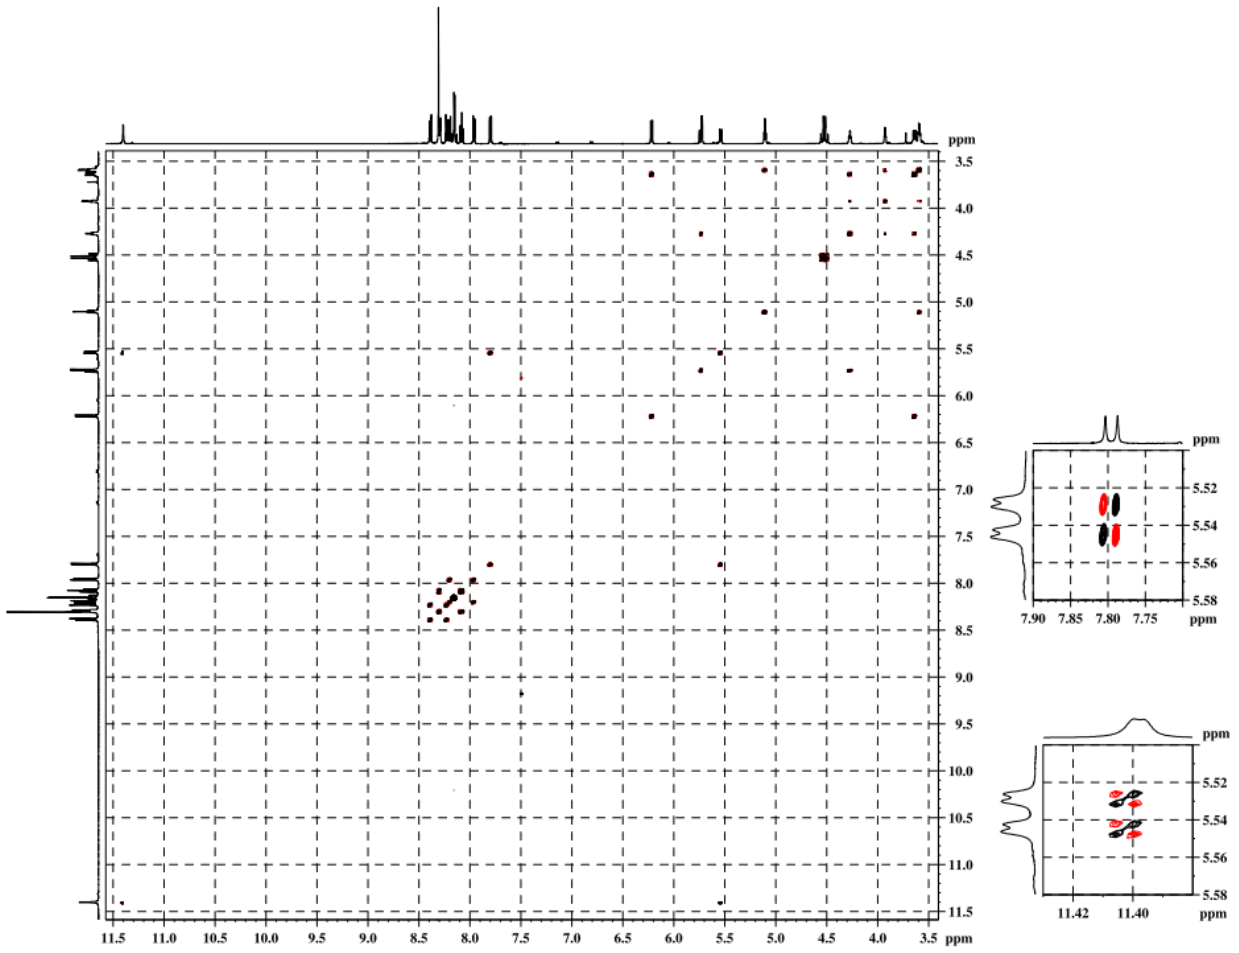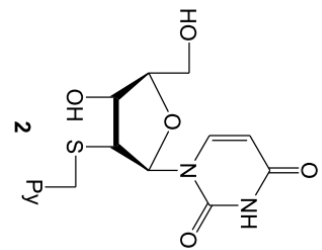

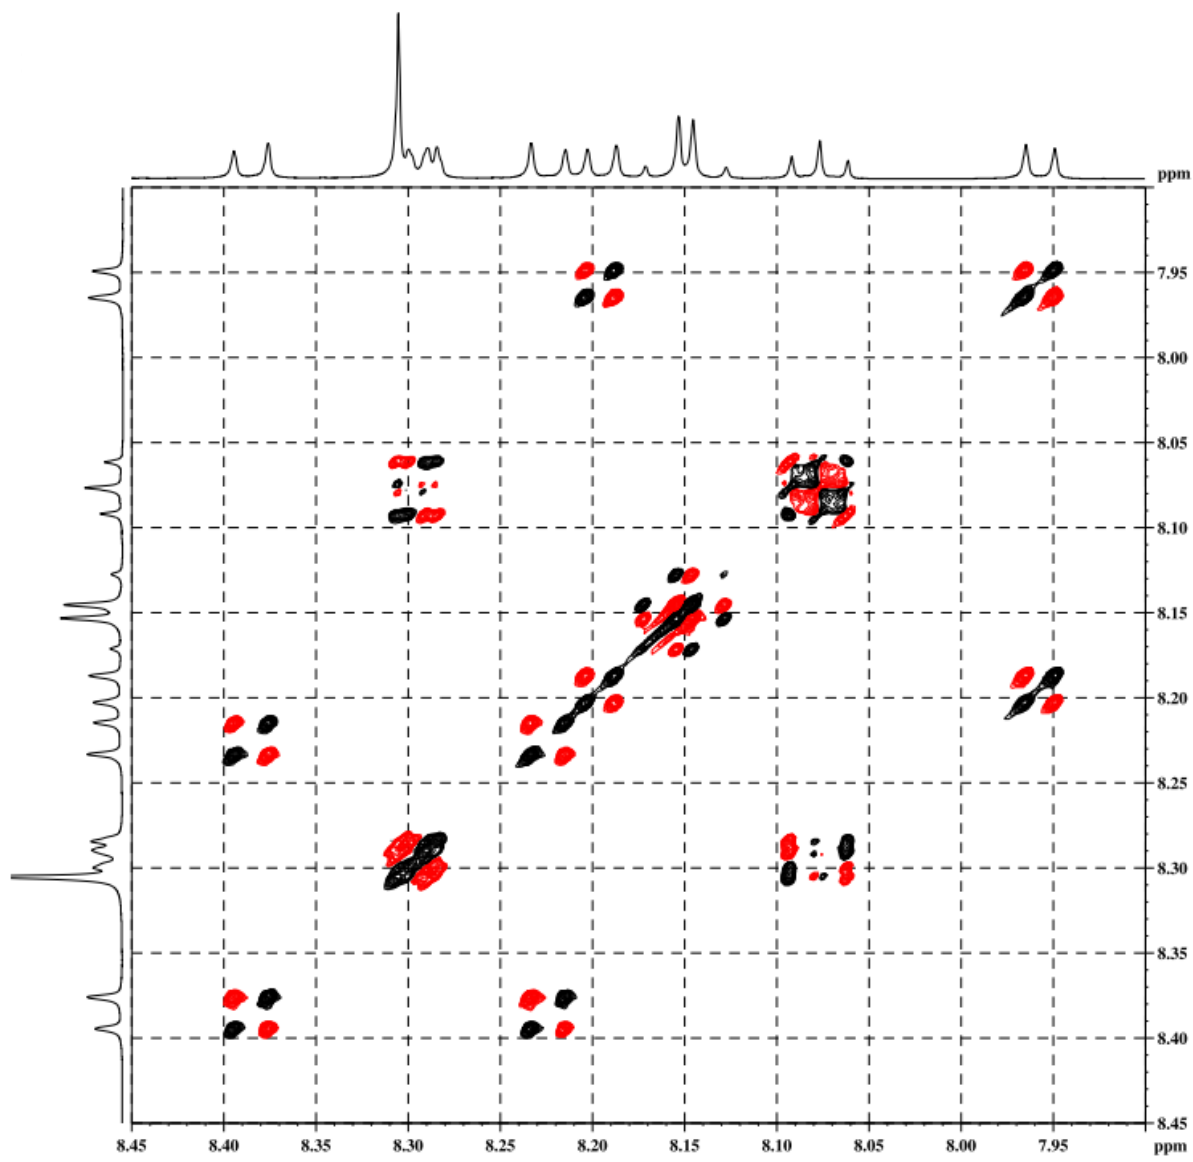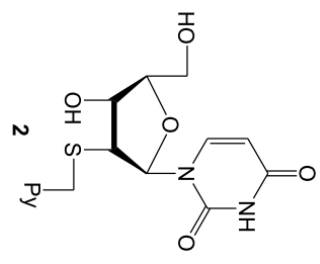

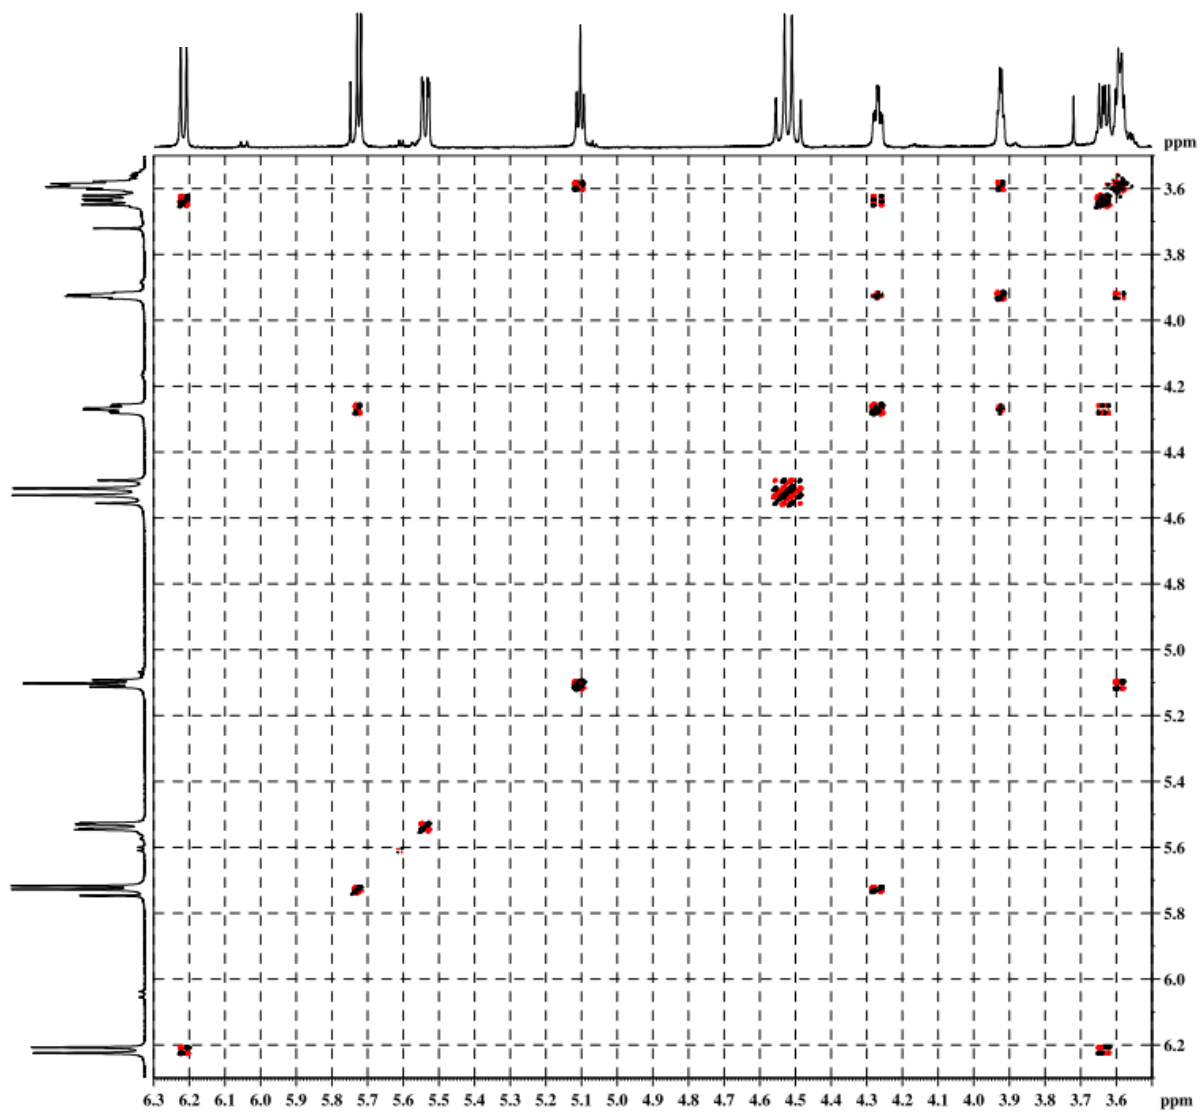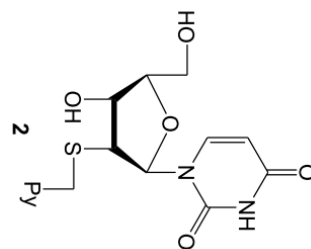



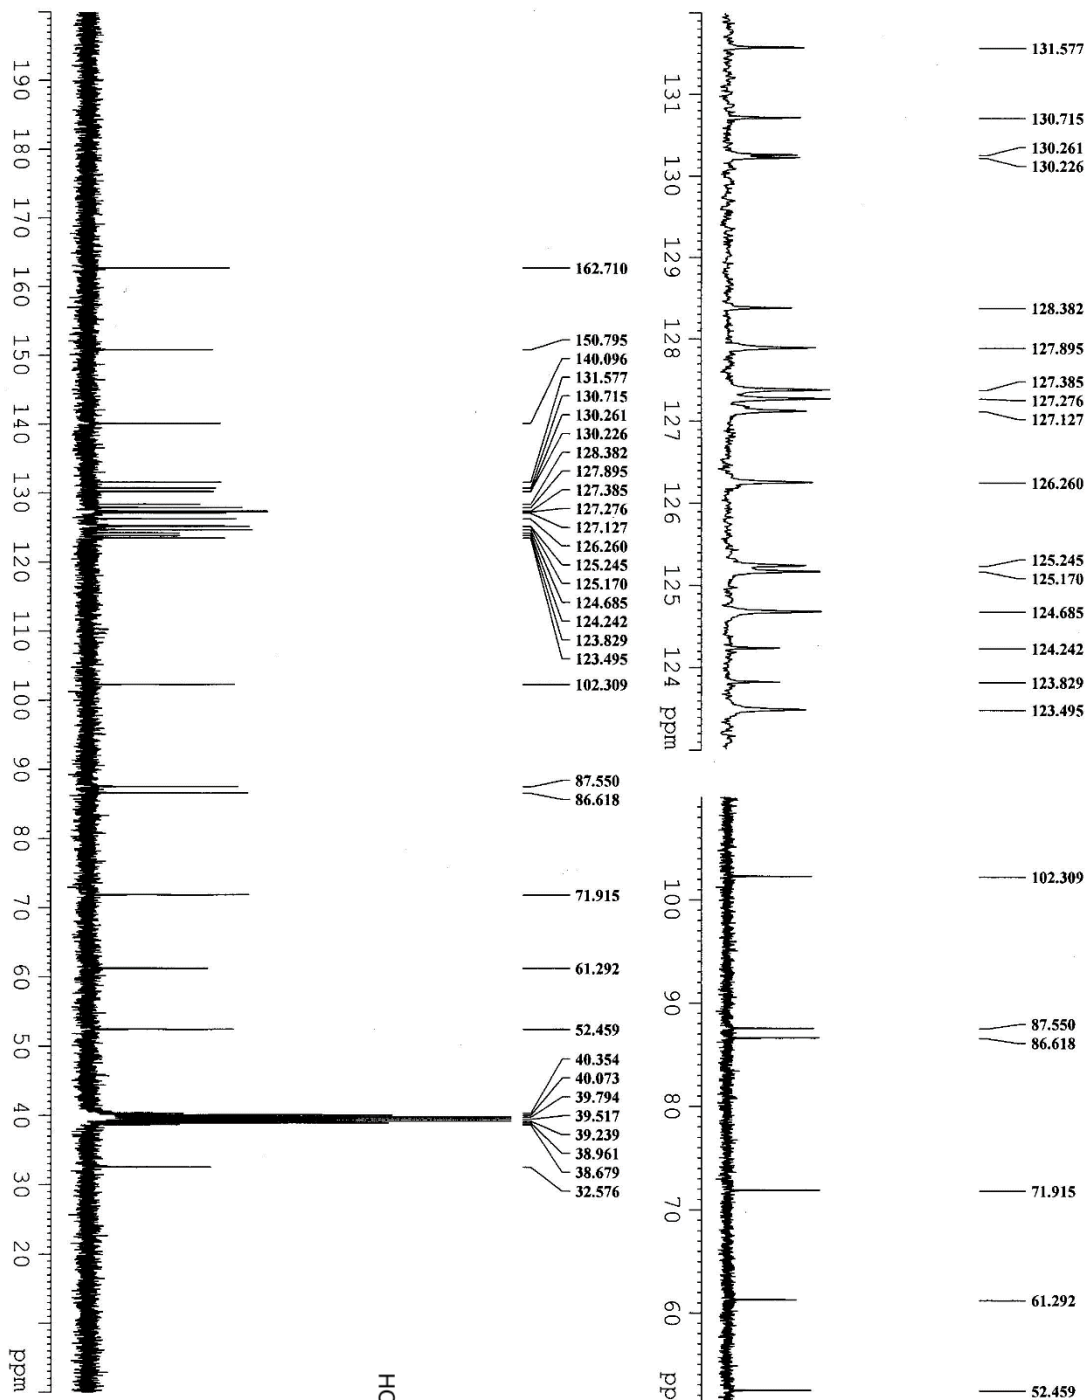

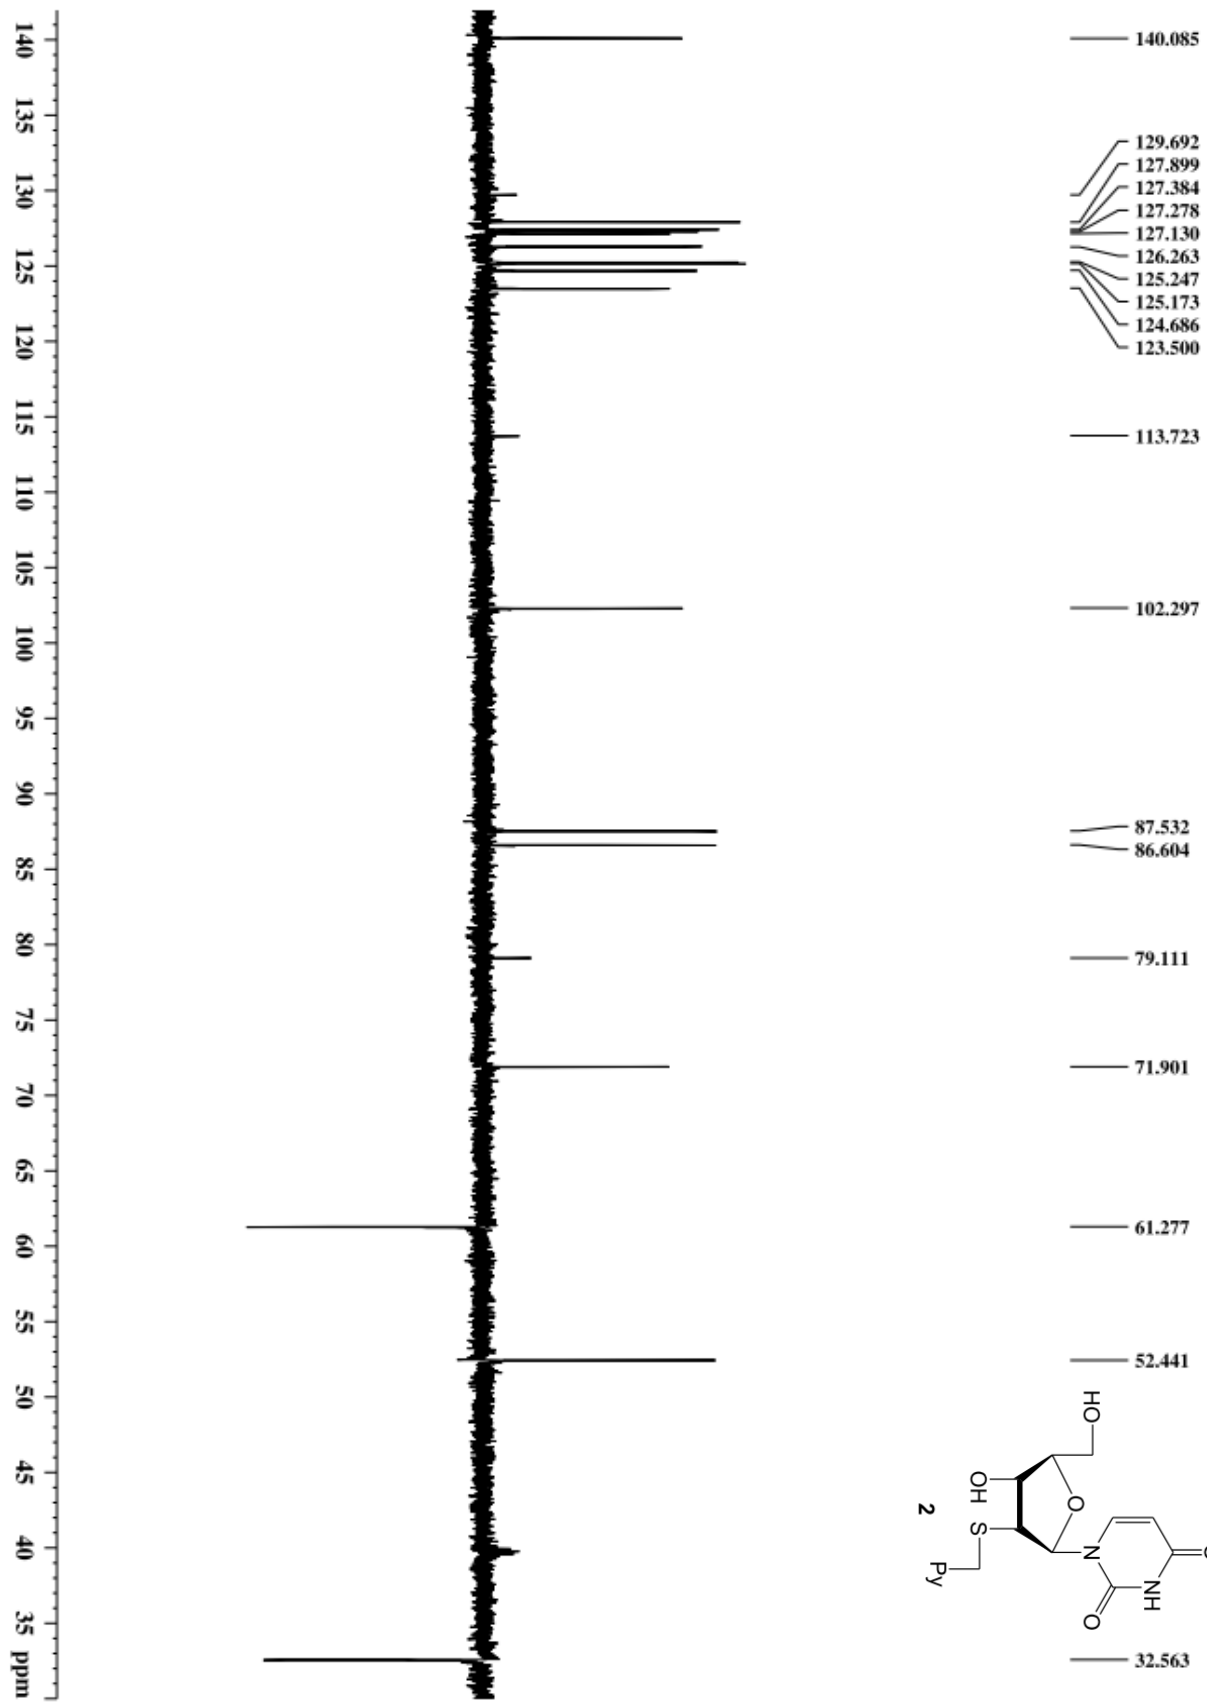

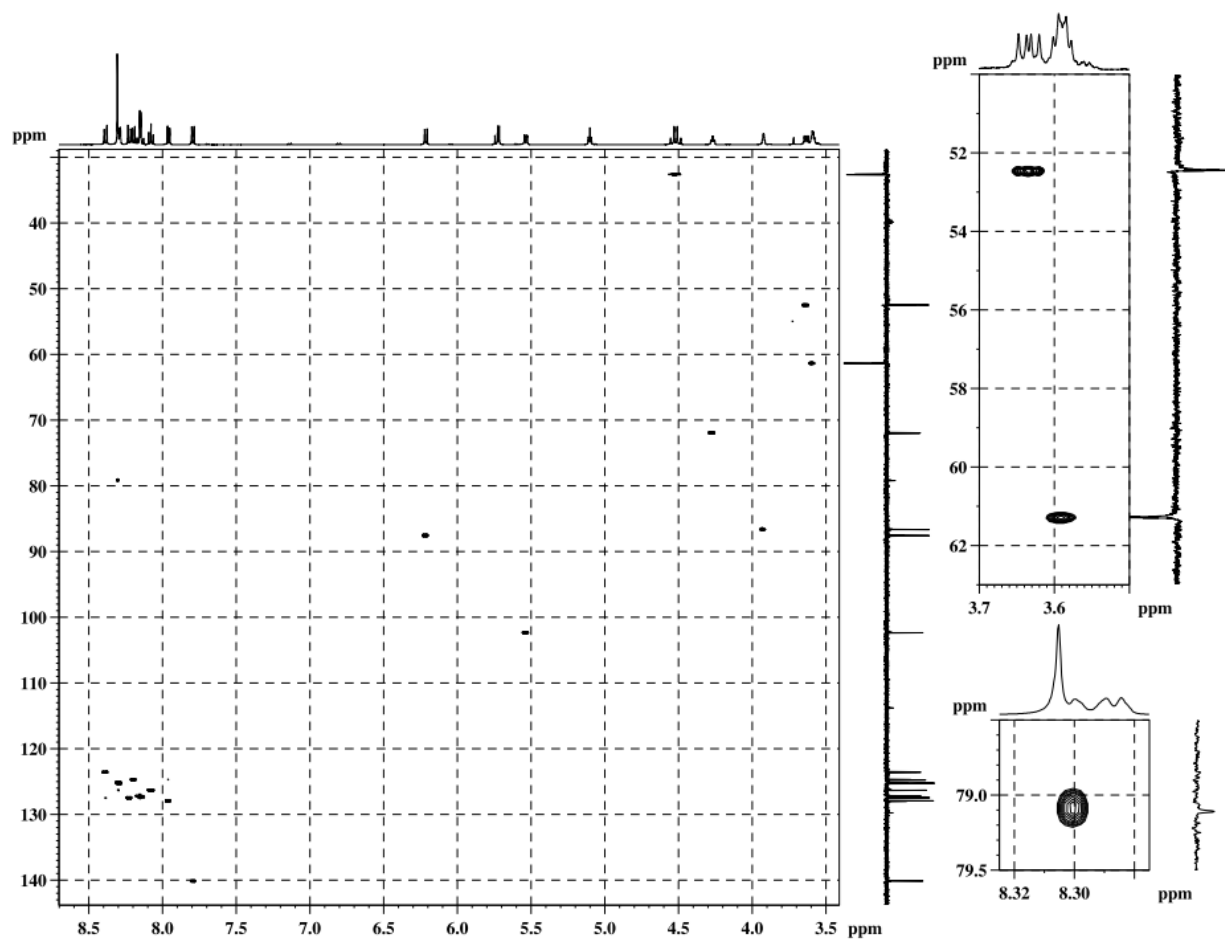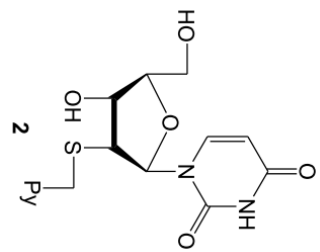

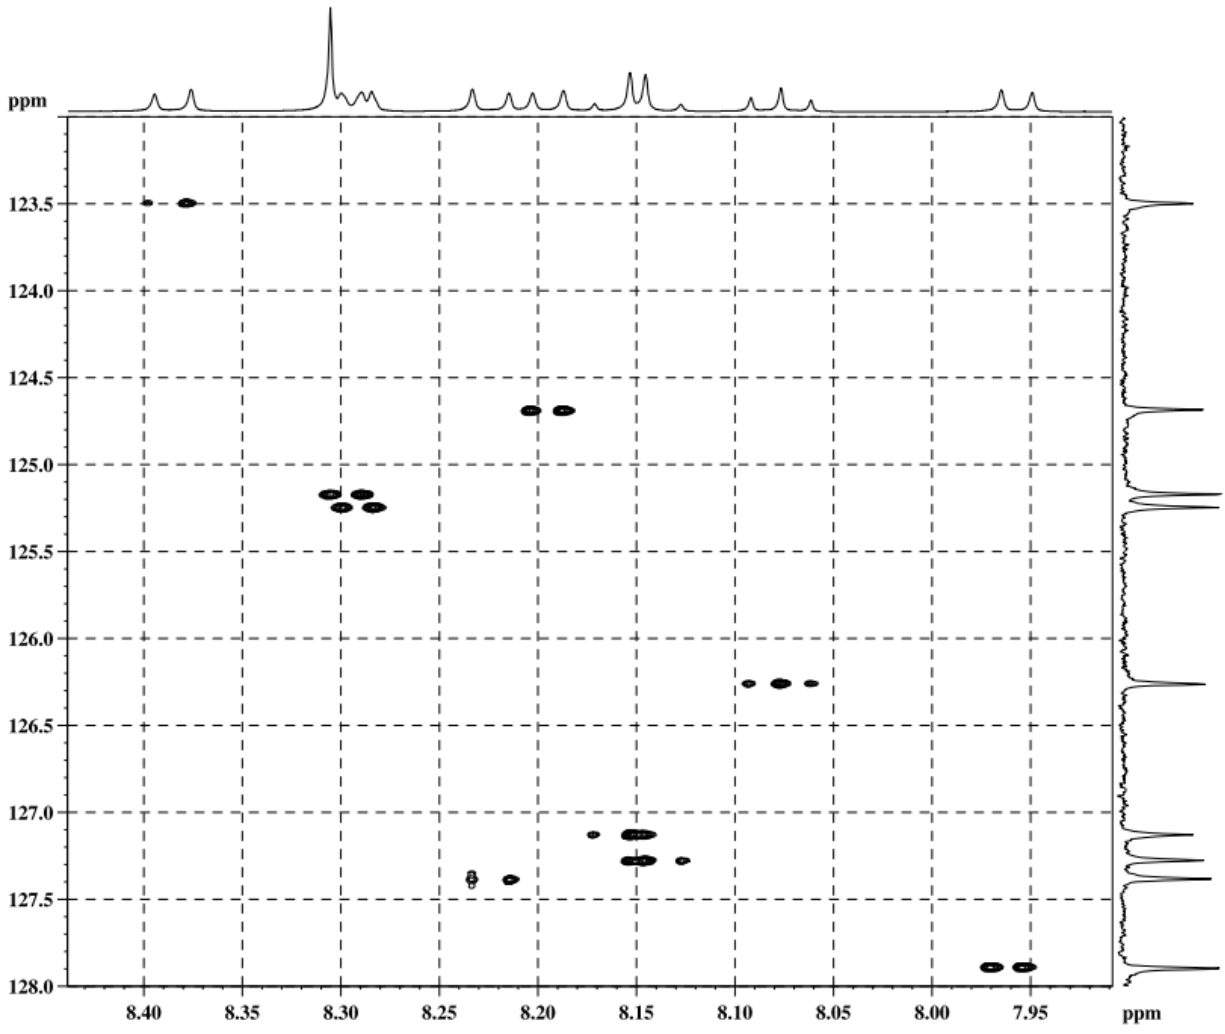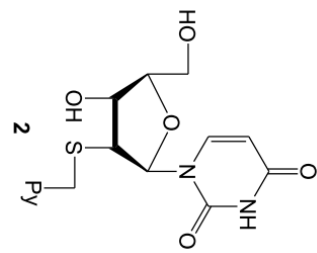

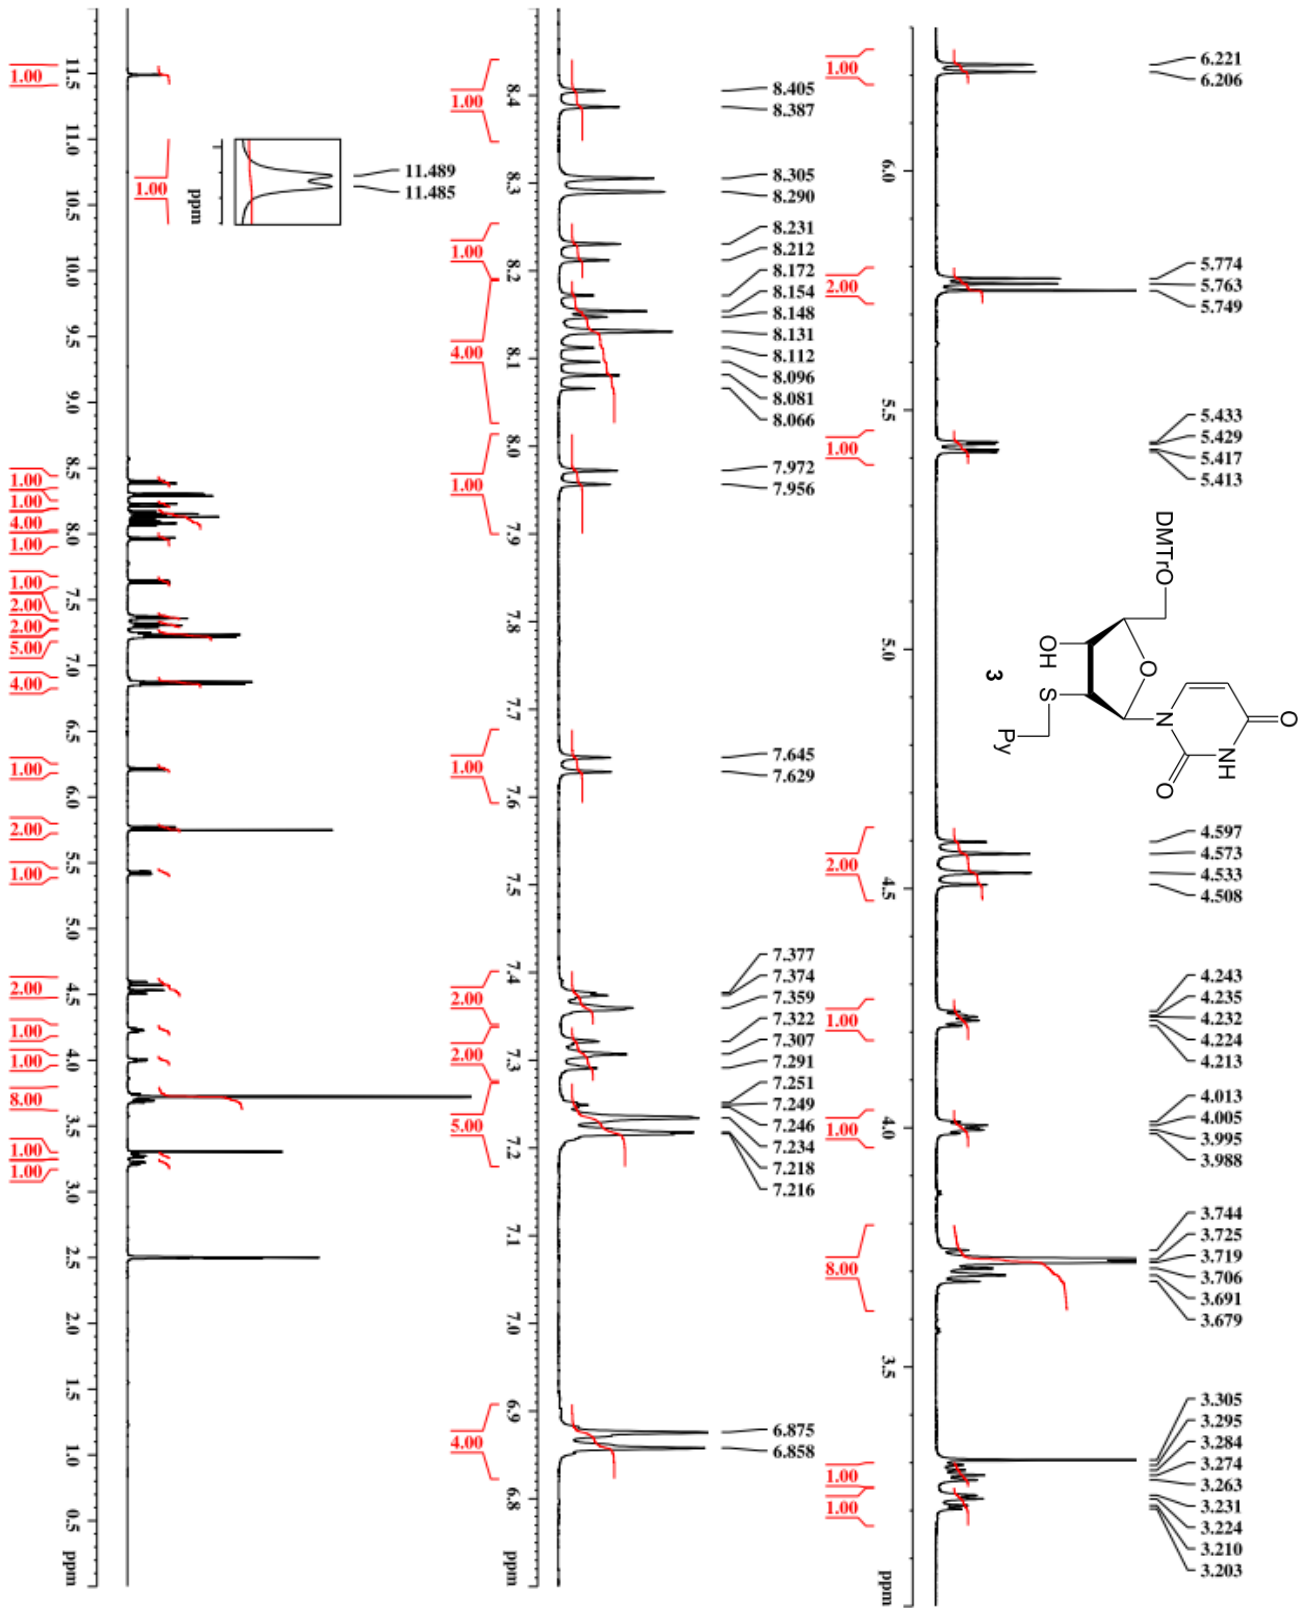

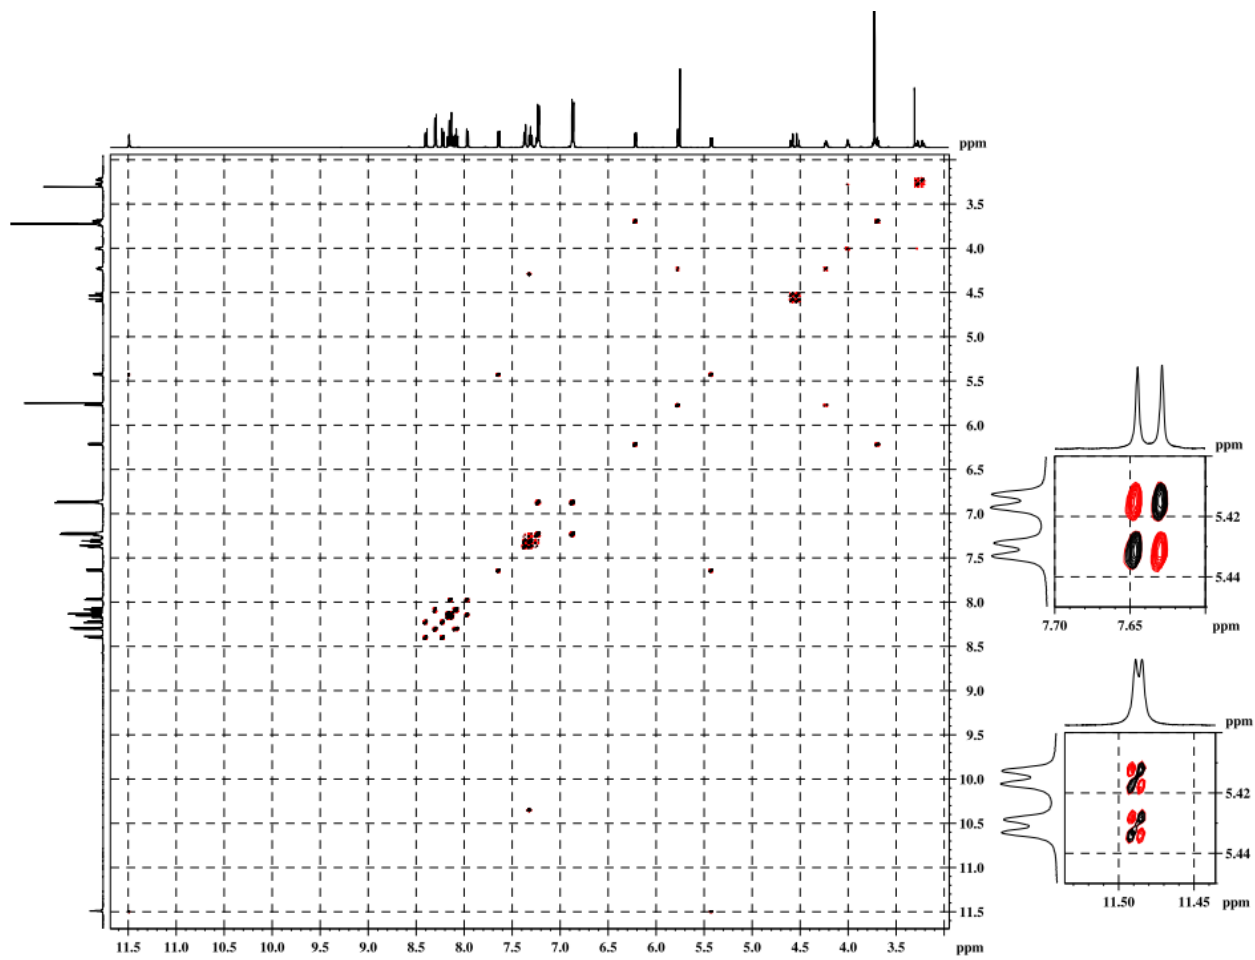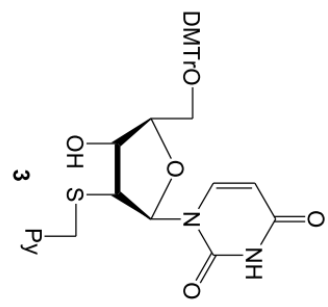

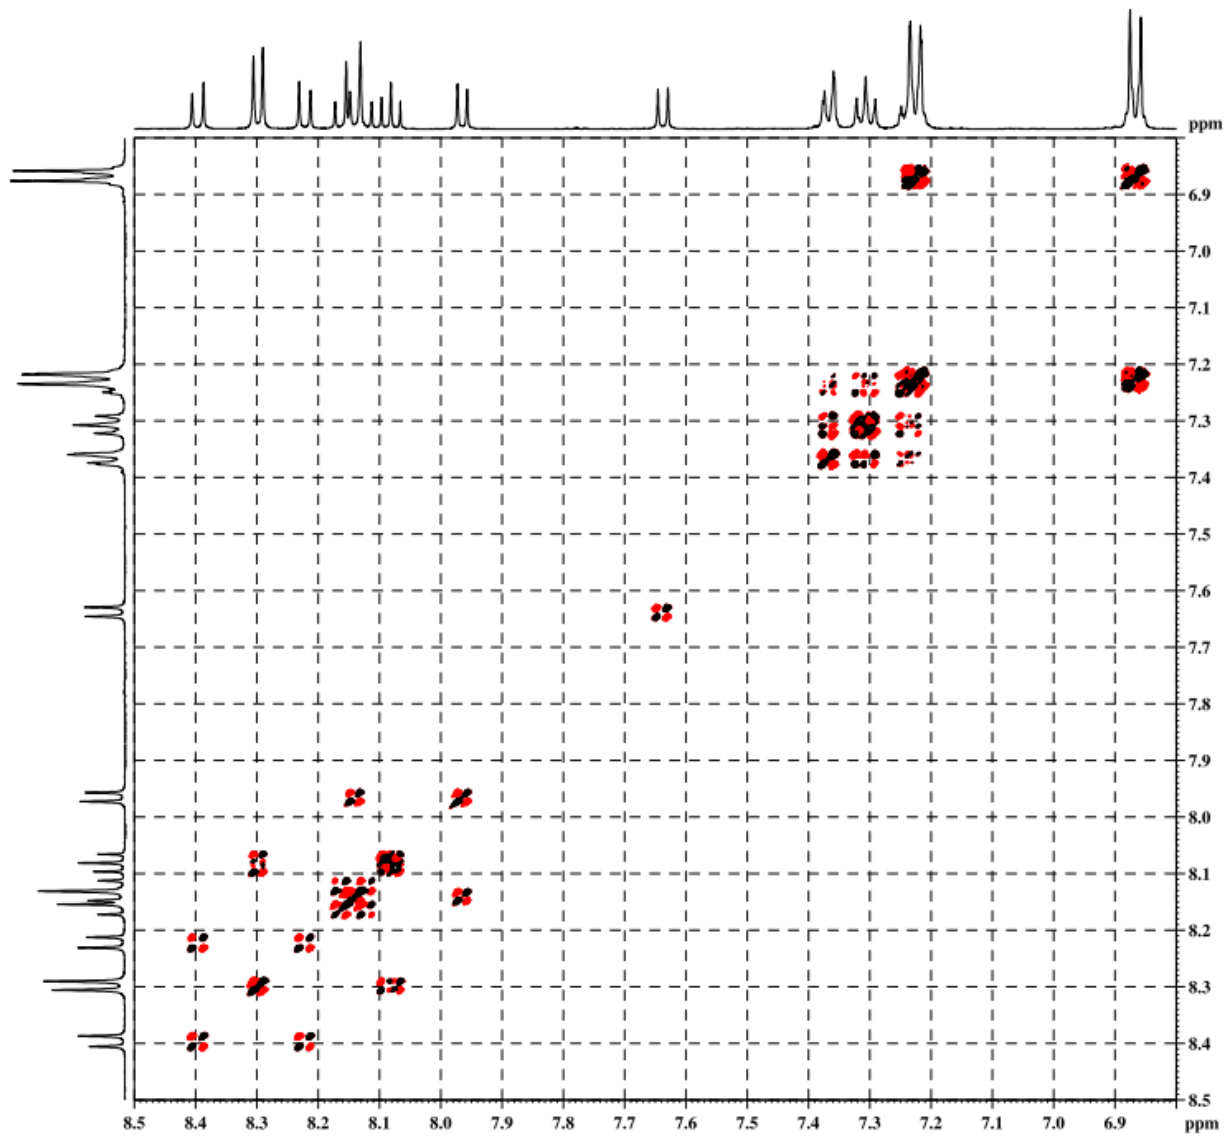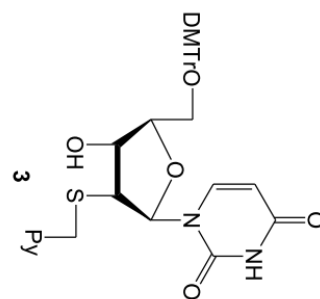

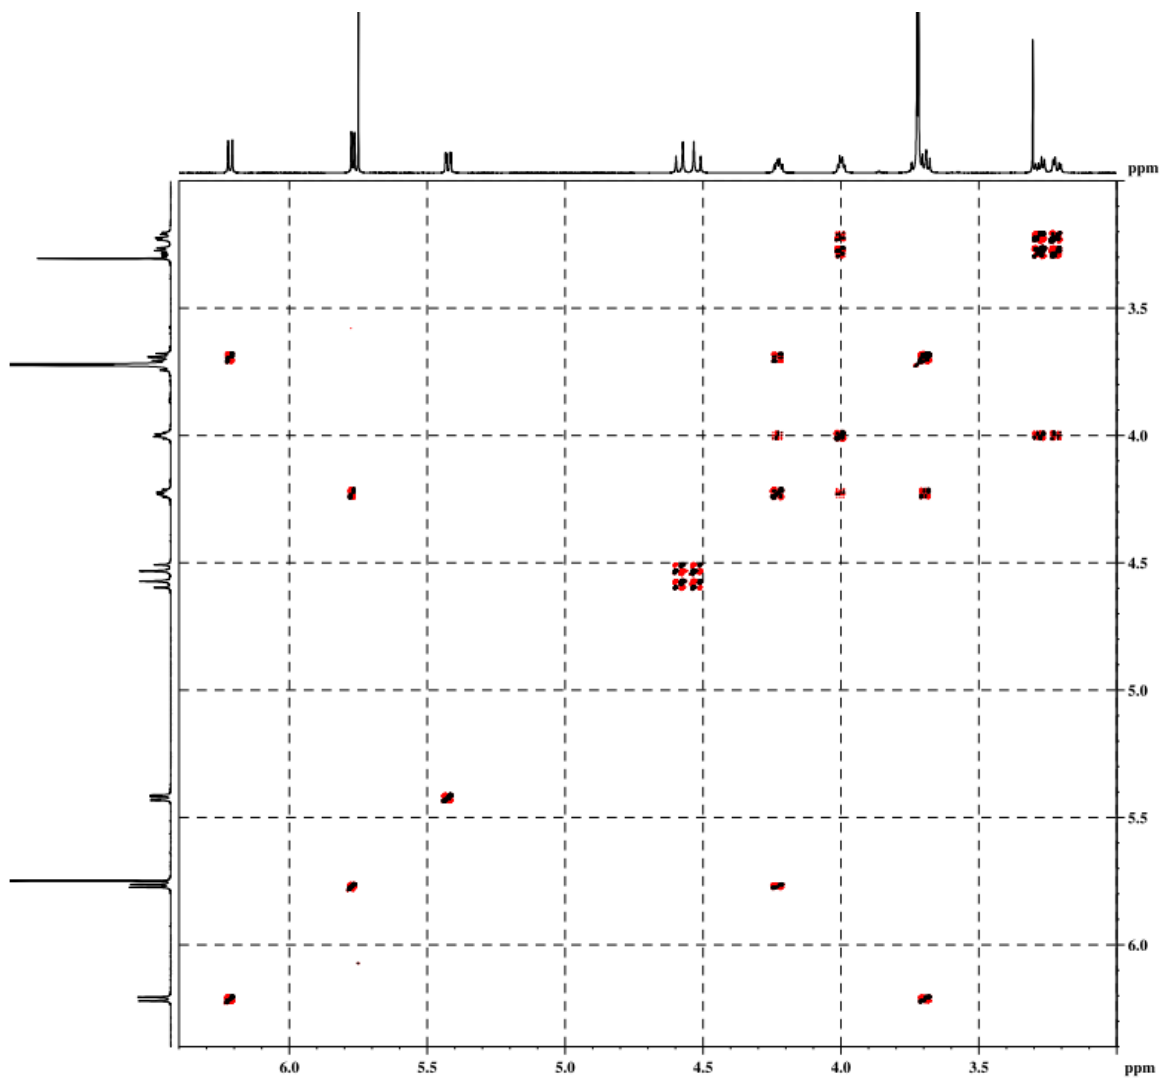



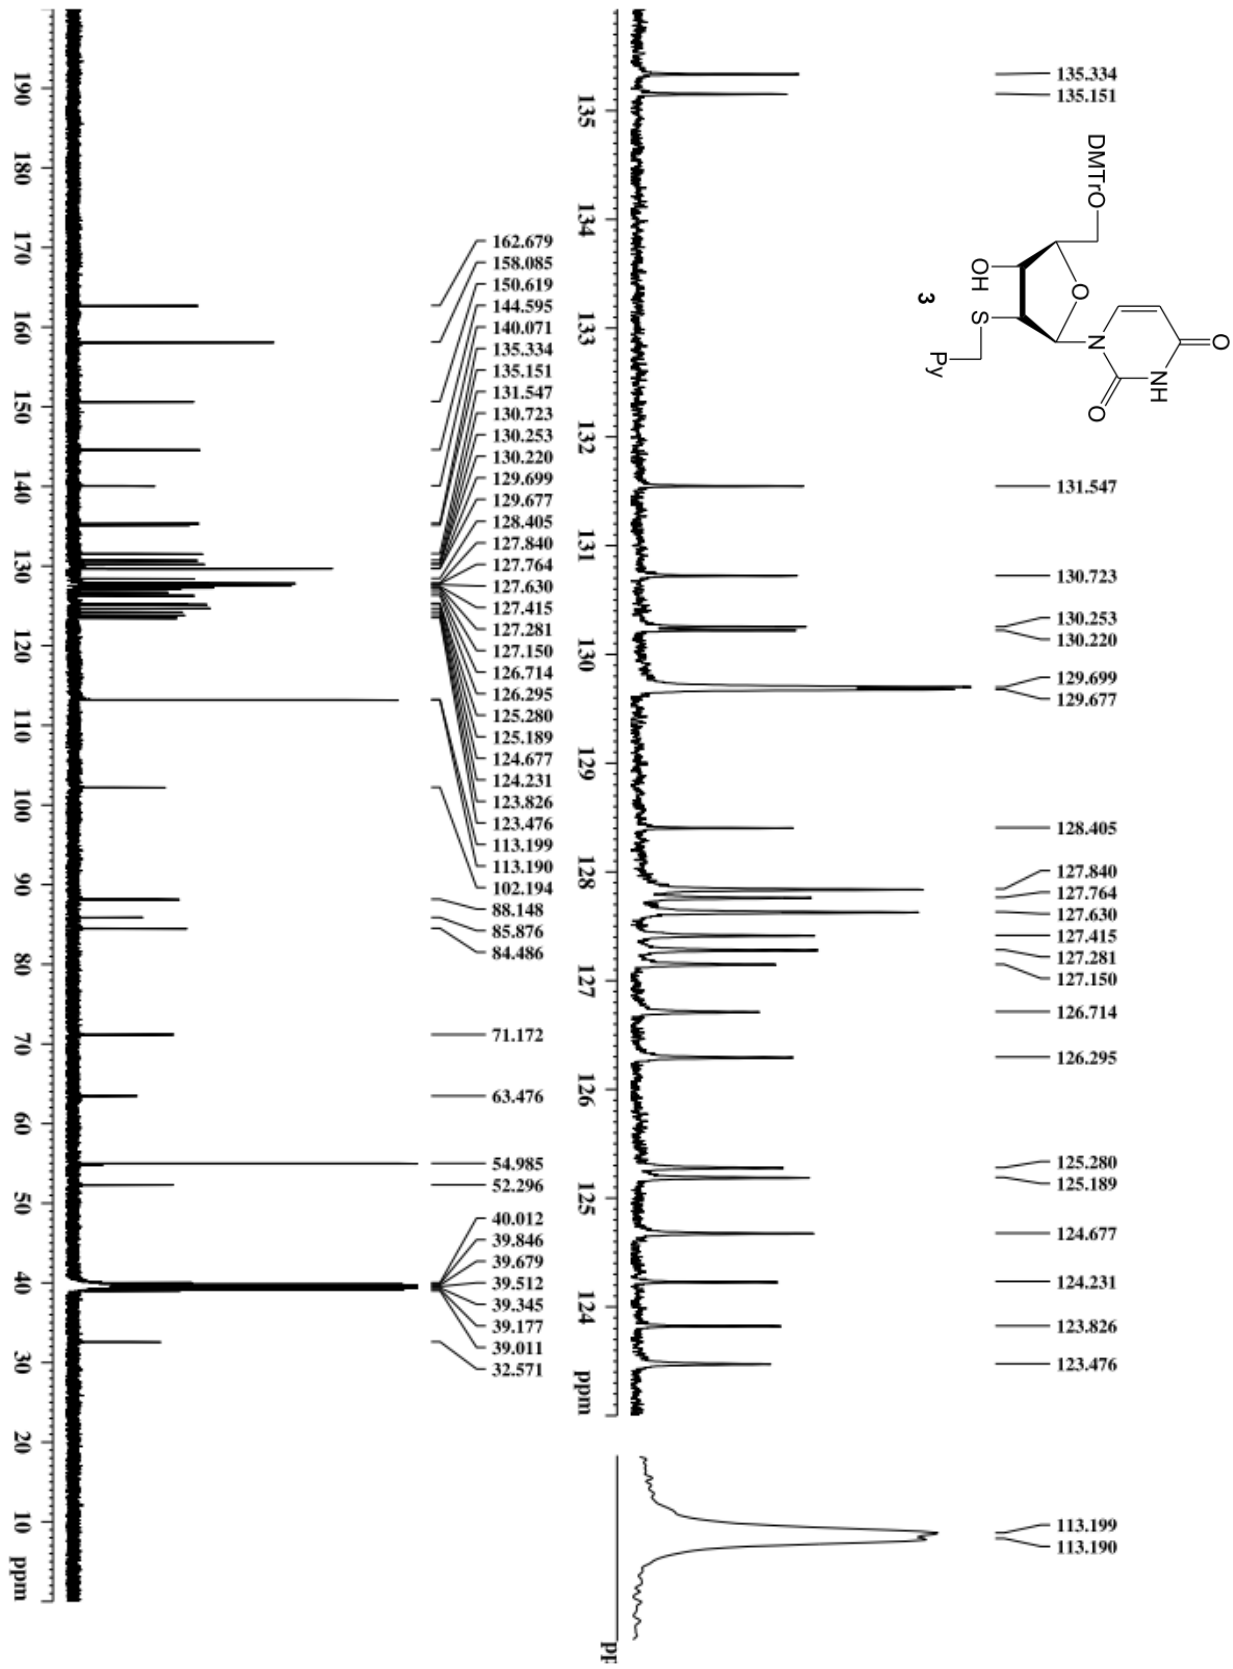

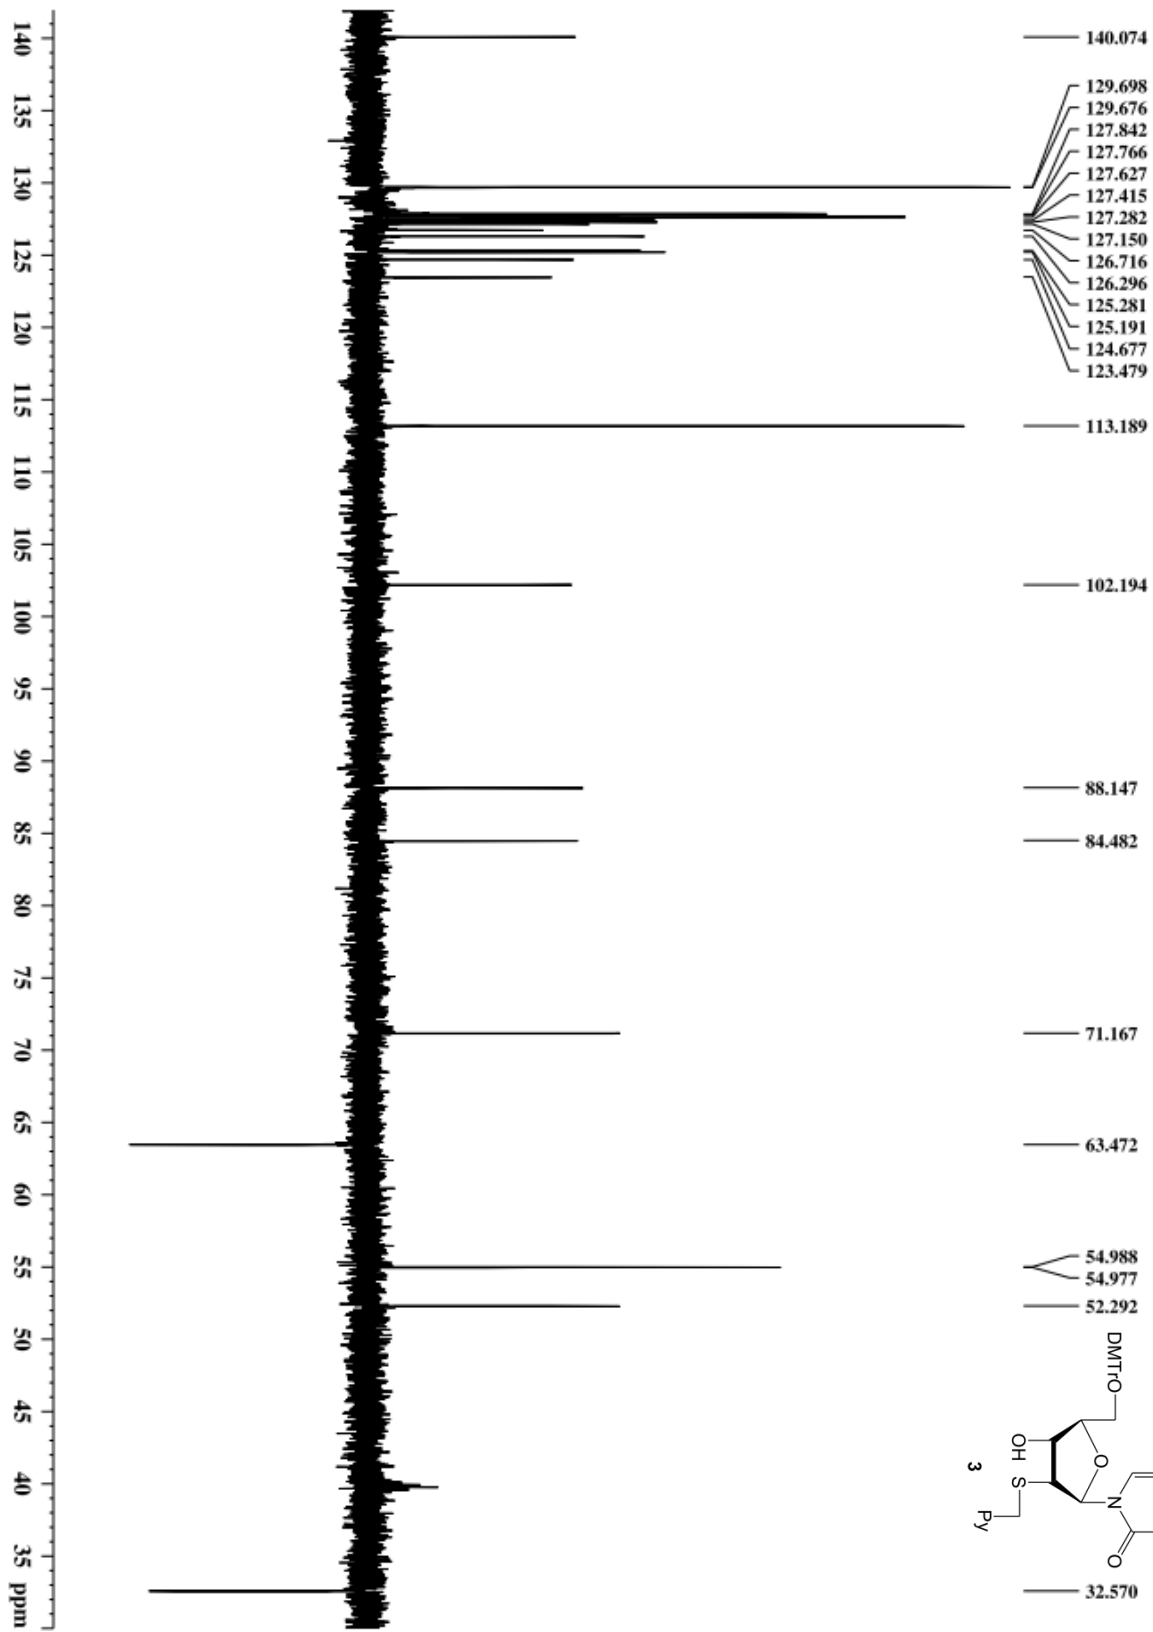

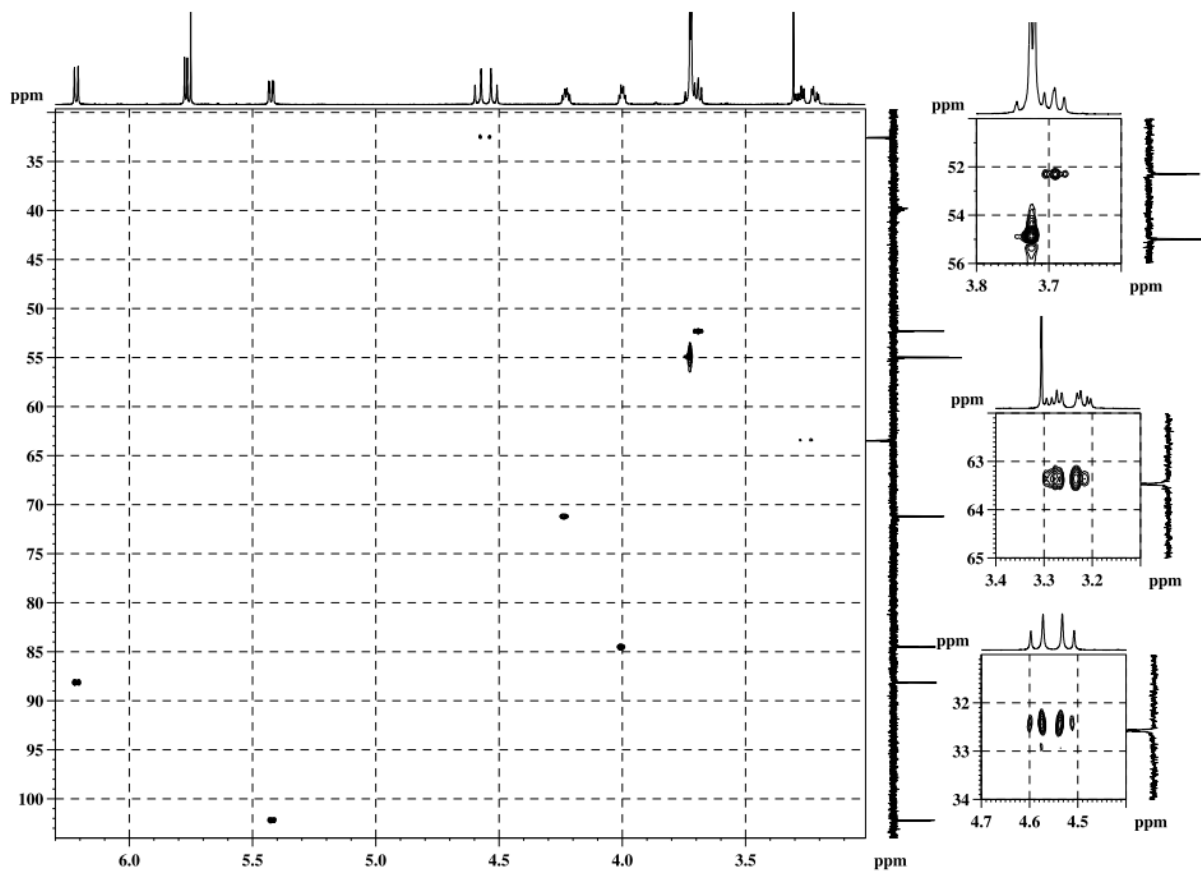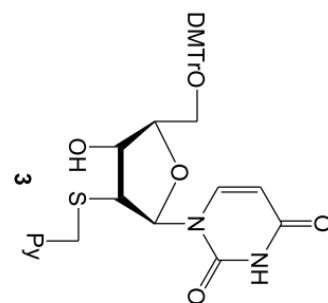

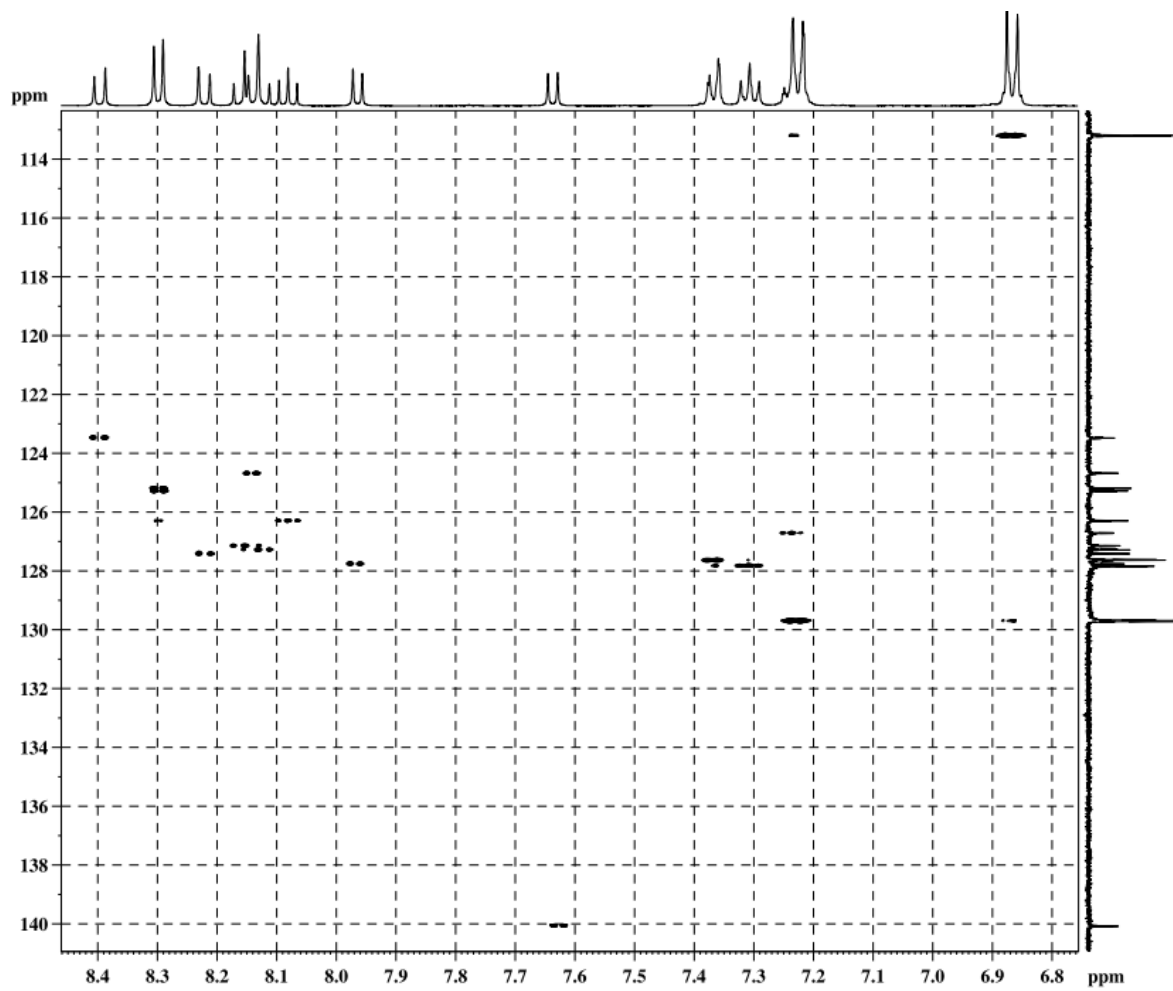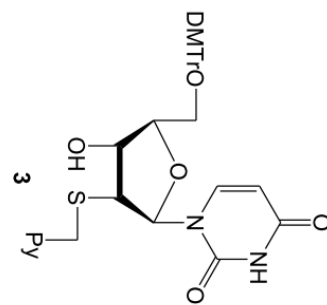

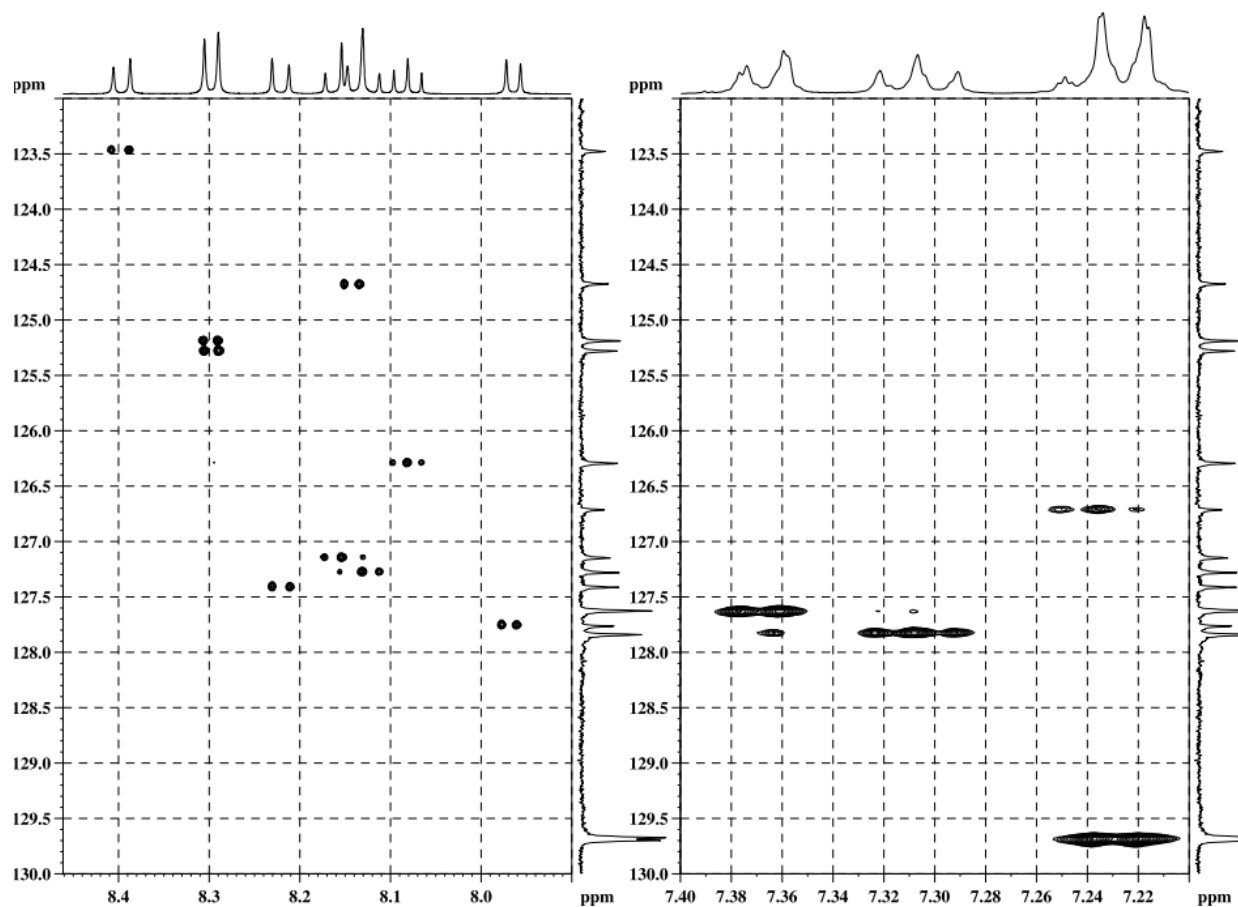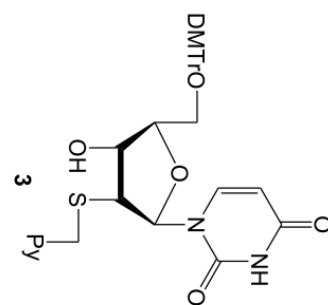

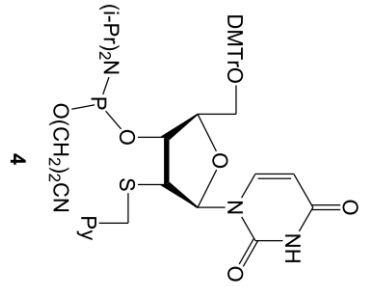

150.886  
149.908

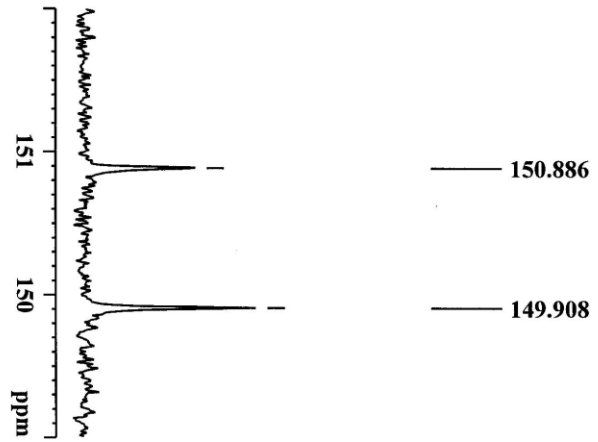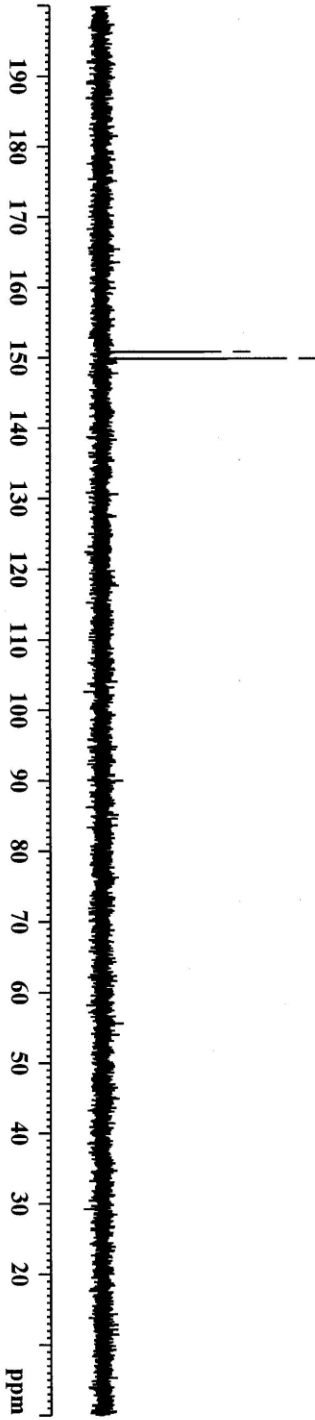

Supplement: NIHMS706396-supplement-Suppl.pdf [file NIHMS706396-supplement-Suppl.pdf]
